# Supplementary material for: Studying the dimensions of m-interactivity and customers’ engagement in m-commerce applications
Source: PeerJ Comput Sci. 2023 May 22;9:e1392. doi: 10.7717/peerj-cs.1392 (PMC10280500; doi:10.7717/peerj-cs.1392)
Supplement: Supplemental Information 1 — The five hundred questionnaire links were distributed randomly among Saudi citizens. The Partial least squares (PLS) were implemented to analyse the data to test the proposed hypotheses and get the rest of the results. The results revealed that the questionnaire used in this study was valid and reliable. Also, it revealed that active control, connectedness, responsiveness, and synchronicity positively impact customers’ engagement in m-commerce applications. [file peerj-cs-09-1392-s001.xlsx]

## Sheet: ردود النموذج 1
timestamp	gender	age	qualification	employment	employment	I can easily navigate through mobile e-commerce applications	As I browse through mobile e-commerce apps, my actions are based on my past experiences with mobile e-commerce apps	I feel like I can control a great deal of my experience with mobile e-commerce apps	I can have a lot of control over my experience while browsing mobile e-commerce apps.	I can fully control my visits to mobile e-commerce applications	I feel like I can control a great deal of using mobile e-commerce apps	I can freely choose what I want to see when I use mobile e-commerce applications.	Mobile e-commerce apps allow me to order products or services tailored to me	The ads and promotions that mobile e-commerce apps send to me are tailored to my situation	Mobile e-commerce apps make me feel like a unique customer	Customized offers are delivered through mobile e-commerce applications	Personalized messages are sent via mobile e-commerce applications	Mobile e-commerce applications provide capabilities for custom information search	I can access mobile e-commerce applications at any time to obtain the necessary information or service	I can use mobile e-commerce applications "anywhere" and "anytime" when needed	Mobile e-commerce applications allow me to order products or services anywhere, anytime	I can access mobile e-commerce applications anywhere to get the necessary information or services	I feel always connected to mobile e-commerce applications	I can easily communicate with mobile e-commerce applications regardless of time and place	Customers of mobile e-commerce applications share their experiences about the product or service with other customers	Customers of mobile e-commerce applications benefit from the community that these applications nurture	Customers of mobile e-commerce applications share a common bond with other members of a community curated by these applications	Being part of the mobile ecommerce app community makes me feel more connected to the brand I love	Being part of the mobile e-commerce app community makes me feel more connected to other consumers of the same brands that I love	Mobile e-commerce applications have the ability to answer my specific related questions	Mobile e-commerce applications facilitate two-way communication between customers and businesses	The information that appears after my dealings with mobile e-commerce applications meets my expectations	The information that appears after I deal with mobile e-commerce applications is appropriate	Whenever I use mobile e-commerce apps, I can always count on receiving a lot of responses to my questions and comments.	Mobile e-commerce applications process my inputs very quickly	Getting information from mobile e-commerce apps is very fast	I can get the information I want without any delay	I feel like I'm getting instant information	Mobile e-commerce apps seem to be very quick to respond to my requests	When I click on links in mobile e-commerce apps, I feel like I'm getting instant information	I proactively communicate with mobile e-commerce applications regarding potential service-related issues	I offer constructive suggestions for mobile e-commerce applications on how they can improve their services	I let mobile e-commerce apps figure out which ways can best serve my needs	I say positive things to others about his mobile e-commerce app and his staff	I recommend others to use mobile e-commerce apps.	I encourage friends and relatives to use mobile e-commerce applications in the future	I post pictures of my activity using mobile e-commerce apps on social media.	I like to write blogs about my positive experience with mobile e-commerce apps.	Mobile e-commerce applications provide opportunities to share my experience with others via social media.
2022-03-27 10:01:12	male	between 41 and 60 years	postgraduate	Government employee	from 2 to 3 years	agree	agree	agree	neutral	neutral	agree	agree	agree	agree	neutral	strongly agree	agree	agree	agree	agree	agree	neutral	agree	agree	agree	agree	agree	strongly agree	agree	strongly agree	agree	agree	agree	strongly agree	strongly agree	strongly agree	agree	agree	agree	agree	agree	agree	agree	agree	agree	agree	strongly agree	agree	agree
2022-03-30 13:43:50	male	between 18 and 40 years	postgraduate	Government employee	3 years and more	agree	strongly agree	agree	agree	strongly agree	strongly agree	agree	agree	neutral	agree	strongly agree	agree	agree	neutral	strongly agree	strongly agree	agree	agree	agree	agree	neutral	neutral	agree	strongly disagree	agree	agree	agree	agree	agree	agree	agree	neutral	agree	agree	agree	agree	strongly disagree	neutral	agree	agree	agree	neutral	neutral	agree
2022-03-31 00:51:44	male	between 18 and 40 years	postgraduate	Government employee	I have never used mobile echommerce applications	neutral	neutral	neutral	neutral	neutral	neutral	neutral	neutral	neutral	neutral	neutral	neutral	neutral	neutral	neutral	neutral	neutral	neutral	neutral	neutral	neutral	neutral	neutral	neutral	neutral	neutral	neutral	neutral	neutral	neutral	neutral	neutral	neutral	neutral	neutral	neutral	neutral	neutral	neutral	neutral	neutral	neutral	neutral	neutral
2022-03-31 00:55:42	male	between 18 and 40 years	bachelor	student	3 years and more	strongly agree	agree	agree	strongly agree	strongly agree	strongly agree	strongly agree	neutral	strongly disagree	لا strongly agree	neutral	neutral	agree	agree	strongly agree	strongly agree	strongly agree	neutral	neutral	neutral	strongly disagree	لا strongly agree	strongly disagree	strongly disagree	strongly disagree	strongly disagree	strongly disagree	neutral	strongly disagree	neutral	agree	agree	neutral	neutral	neutral	agree	agree	strongly disagree	agree	agree	neutral	neutral	neutral	neutral
2022-03-31 01:34:29	female	between 18 and 40 years	postgraduate	Government employee	from 2 to 3 years	agree	agree	agree	neutral	strongly disagree	neutral	strongly disagree	agree	agree	agree	neutral	neutral	agree	strongly disagree	agree	strongly agree	agree	agree	agree	agree	agree	agree	agree	neutral	neutral	strongly agree	agree	agree	agree	agree	neutral	strongly disagree	agree	agree	agree	agree	agree	agree	neutral	agree	agree	strongly disagree	neutral	neutral
2022-03-31 04:01:55	male	between 41 and 60 years	postgraduate	Government employee	from 2 to 3 years	strongly disagree	agree	agree	agree	agree	agree	agree	neutral	strongly disagree	agree	agree	agree	agree	strongly agree	strongly agree	strongly agree	strongly agree	agree	agree	agree	agree	agree	agree	agree	agree	agree	agree	agree	agree	agree	strongly agree	strongly agree	strongly agree	strongly agree	strongly agree	neutral	agree	agree	neutral	agree	agree	strongly disagree	strongly disagree	strongly disagree
2022-03-31 12:10:37	male	between 41 and 60 years	postgraduate	Government employee	3 years and more	agree	agree	agree	agree	agree	agree	agree	agree	agree	agree	agree	agree	agree	agree	agree	agree	agree	agree	agree	agree	agree	agree	agree	agree	agree	agree	agree	agree	agree	agree	agree	agree	agree	agree	agree	agree	agree	agree	agree	agree	agree	agree	agree	agree
2022-03-31 12:12:06	male	between 18 and 40 years	postgraduate	Government employee	3 years and more	agree	agree	agree	agree	agree	agree	agree	agree	agree	agree	agree	agree	agree	agree	agree	agree	agree	agree	agree	agree	agree	agree	agree	agree	agree	agree	agree	agree	agree	agree	agree	agree	agree	agree	agree	agree	agree	agree	agree	agree	agree	agree	agree	agree
2022-03-31 12:12:43	male	between 18 and 40 years	diploma	private sector employee	from 1 year to less than 2 years	agree	agree	agree	strongly agree	strongly agree	strongly agree	agree	agree	agree	agree	agree	agree	agree	strongly agree	strongly agree	strongly agree	strongly agree	agree	agree	neutral	neutral	neutral	agree	neutral	neutral	neutral	agree	agree	neutral	strongly agree	strongly agree	strongly agree	strongly agree	strongly agree	strongly agree	neutral	neutral	neutral	agree	agree	agree	strongly disagree	strongly disagree	neutral
2022-03-31 12:15:34	male	between 41 and 60 years	diploma	Government employee	3 years and more	strongly agree	agree	agree	agree	agree	agree	agree	agree	strongly disagree	neutral	strongly disagree	strongly disagree	strongly disagree	agree	agree	agree	agree	agree	agree	strongly agree	agree	agree	agree	agree	agree	agree	agree	agree	agree	agree	agree	agree	agree	agree	agree	agree	agree	agree	agree	agree	agree	agree	agree	agree
2022-03-31 12:19:08	male	between 18 and 40 years	high school	student	3 years and more	strongly agree	strongly agree	neutral	neutral	agree	agree	strongly agree	strongly agree	agree	neutral	agree	agree	strongly agree	strongly agree	strongly agree	strongly agree	strongly agree	agree	strongly agree	agree	agree	neutral	neutral	neutral	agree	agree	agree	agree	agree	strongly agree	strongly agree	strongly agree	strongly agree	strongly agree	strongly agree	neutral	neutral	neutral	agree	agree	agree	strongly disagree	neutral	agree
2022-03-31 12:20:28	male	between 18 and 40 years	postgraduate	private sector employee	3 years and more	strongly agree	agree	agree	agree	strongly agree	agree	strongly agree	strongly disagree	neutral	strongly disagree	strongly agree	agree	strongly agree	agree	agree	strongly agree	agree	agree	agree	strongly agree	agree	strongly disagree	strongly agree	agree	strongly agree	agree	agree	agree	neutral	agree	agree	agree	strongly disagree	agree	لا strongly agree	agree	strongly disagree	strongly disagree	agree	strongly agree	strongly agree	لا strongly agree	neutral	neutral
2022-03-31 12:20:36	male	between 41 and 60 years	postgraduate	Government employee	3 years and more	strongly agree	agree	agree	agree	neutral	agree	strongly agree	neutral	agree	agree	agree	agree	strongly agree	agree	strongly agree	agree	agree	agree	strongly disagree	neutral	neutral	neutral	strongly disagree	strongly disagree	agree	strongly disagree	agree	neutral	neutral	agree	agree	agree	neutral	agree	neutral	neutral	neutral	agree	neutral	neutral	neutral	neutral	strongly disagree	strongly disagree
2022-03-31 12:20:43	male	between 41 and 60 years	postgraduate	Government employee	3 years and more	agree	strongly disagree	neutral	neutral	strongly disagree	strongly disagree	agree	neutral	agree	agree	agree	agree	agree	agree	strongly agree	strongly agree	strongly agree	agree	agree	agree	agree	agree	agree	agree	agree	agree	neutral	neutral	strongly disagree	neutral	agree	agree	agree	agree	agree	agree	agree	agree	agree	agree	agree	strongly disagree	agree	agree
2022-03-31 12:20:43	male	between 18 and 40 years	postgraduate	Government employee	3 years and more	strongly agree	strongly agree	strongly agree	strongly agree	agree	agree	agree	agree	strongly disagree	agree	agree	agree	agree	agree	agree	agree	agree	agree	agree	agree	agree	agree	agree	agree	agree	agree	agree	agree	agree	agree	agree	agree	agree	agree	agree	agree	agree	agree	agree	agree	agree	agree	agree	agree
2022-03-31 12:22:07	male	between 18 and 40 years	bachelor	student	from 1 year to less than 2 years	agree	agree	neutral	neutral	neutral	agree	strongly disagree	strongly disagree	neutral	neutral	neutral	agree	neutral	agree	strongly agree	strongly agree	agree	agree	agree	neutral	neutral	agree	neutral	neutral	agree	neutral	agree	agree	agree	agree	neutral	agree	strongly agree	agree	neutral	neutral	neutral	neutral	neutral	agree	agree	neutral	strongly disagree	neutral
2022-03-31 12:22:09	male	between 41 and 60 years	postgraduate	Government employee	3 years and more	strongly agree	strongly agree	strongly agree	strongly agree	agree	agree	strongly agree	agree	strongly disagree	agree	agree	agree	agree	agree	agree	strongly agree	strongly agree	strongly agree	strongly agree	strongly agree	strongly agree	strongly agree	agree	agree	agree	strongly agree	agree	agree	agree	agree	strongly agree	strongly agree	strongly agree	strongly agree	strongly agree	strongly agree	strongly agree	strongly agree	strongly agree	agree	agree	strongly disagree	strongly disagree	agree
2022-03-31 12:23:06	male	between 18 and 40 years	bachelor	Government employee	3 years and more	strongly agree	agree	strongly agree	agree	agree	agree	neutral	strongly disagree	neutral	neutral	agree	agree	agree	agree	agree	agree	agree	agree	agree	neutral	agree	neutral	agree	neutral	strongly disagree	agree	neutral	neutral	strongly disagree	neutral	neutral	neutral	neutral	neutral	strongly disagree	neutral	strongly agree	agree	agree	agree	agree	neutral	neutral	neutral
2022-03-31 12:37:16	male	between 41 and 60 years	postgraduate	Government employee	3 years and more	strongly agree	strongly agree	strongly agree	strongly agree	strongly agree	agree	agree	agree	neutral	neutral	agree	agree	agree	strongly agree	strongly agree	strongly agree	strongly agree	agree	agree	strongly agree	strongly agree	neutral	agree	neutral	agree	agree	agree	agree	agree	agree	agree	agree	agree	agree	agree	agree	agree	agree	agree	agree	agree	neutral	agree	agree
2022-03-31 12:40:32	male	between 41 and 60 years	postgraduate	Government employee	3 years and more	agree	agree	strongly agree	strongly agree	strongly agree	strongly agree	strongly agree	agree	لا strongly agree	لا strongly agree	agree	agree	agree	agree	agree	agree	agree	agree	agree	neutral	agree	neutral	neutral	neutral	neutral	neutral	neutral	neutral	neutral	neutral	neutral	agree	agree	agree	agree	agree	agree	agree	agree	agree	neutral	neutral	neutral	neutral
2022-03-31 12:40:40	male	between 41 and 60 years	postgraduate	Government employee	3 years and more	strongly agree	strongly agree	strongly agree	strongly agree	strongly agree	strongly agree	strongly agree	neutral	strongly disagree	strongly disagree	agree	agree	agree	strongly agree	strongly agree	strongly agree	strongly agree	strongly agree	strongly agree	agree	agree	agree	agree	agree	agree	agree	agree	agree	agree	agree	strongly agree	strongly agree	strongly agree	strongly agree	strongly agree	neutral	strongly disagree	agree	strongly agree	strongly agree	strongly agree	strongly agree	strongly agree	strongly agree
2022-03-31 12:41:37	male	older than 60 years	postgraduate	other	3 years and more	neutral	agree	neutral	neutral	agree	agree	agree	agree	agree	agree	agree	agree	agree	agree	agree	agree	agree	agree	agree	agree	neutral	neutral	agree	neutral	agree	agree	agree	agree	agree	agree	agree	agree	agree	agree	agree	agree	neutral	agree	agree	neutral	neutral	neutral	neutral	neutral
2022-03-31 12:43:33	male	between 18 and 40 years	postgraduate	Government employee	from 2 to 3 years	strongly agree	agree	strongly agree	strongly agree	strongly agree	strongly agree	strongly agree	agree	agree	agree	strongly agree	strongly agree	strongly agree	strongly agree	strongly agree	strongly agree	strongly agree	strongly agree	strongly agree	strongly agree	strongly agree	strongly agree	strongly agree	strongly agree	agree	neutral	agree	strongly agree	strongly agree	strongly agree	strongly agree	agree	agree	agree	agree	agree	agree	agree	agree	strongly agree	agree	agree	agree	strongly agree
2022-03-31 12:55:19	female	between 18 and 40 years	postgraduate	Government employee	from 2 to 3 years	strongly agree	strongly agree	strongly agree	strongly agree	neutral	neutral	strongly agree	strongly agree	strongly agree	strongly agree	strongly agree	strongly agree	strongly agree	strongly agree	strongly agree	strongly agree	strongly agree	strongly agree	strongly agree	agree	agree	agree	agree	agree	agree	agree	agree	agree	agree	agree	agree	agree	agree	agree	agree	agree	agree	agree	agree	agree	agree	strongly disagree	strongly disagree	agree
2022-03-31 12:55:41	male	between 41 and 60 years	postgraduate	Government employee	3 years and more	strongly agree	neutral	agree	neutral	neutral	agree	agree	strongly disagree	strongly disagree	neutral	agree	agree	strongly disagree	agree	strongly agree	agree	strongly agree	agree	agree	agree	agree	agree	neutral	neutral	strongly disagree	strongly disagree	strongly disagree	strongly disagree	strongly disagree	agree	agree	neutral	neutral	agree	neutral	neutral	neutral	neutral	neutral	agree	agree	neutral	neutral	neutral
2022-03-31 12:55:48	male	between 18 and 40 years	postgraduate	Government employee	from 1 year to less than 2 years	strongly agree	agree	agree	agree	agree	agree	agree	agree	neutral	agree	agree	agree	agree	agree	agree	agree	agree	agree	agree	neutral	neutral	neutral	neutral	neutral	neutral	agree	neutral	neutral	agree	agree	neutral	neutral	neutral	neutral	neutral	agree	agree	agree	neutral	neutral	agree	agree	agree	neutral
2022-03-31 12:56:49	male	between 41 and 60 years	postgraduate	Government employee	3 years and more	strongly agree	agree	strongly agree	strongly disagree	strongly agree	strongly disagree	لا strongly agree	strongly disagree	strongly disagree	لا strongly agree	لا strongly agree	لا strongly agree	strongly disagree	لا strongly agree	strongly agree	strongly agree	agree	agree	agree	agree	agree	agree	agree	agree	neutral	neutral	agree	agree	agree	strongly agree	strongly agree	agree	agree	agree	agree	agree	agree	agree	agree	agree	agree	agree	agree	agree
2022-03-31 12:58:18	male	between 41 and 60 years	postgraduate	Government employee	3 years and more	strongly agree	strongly agree	agree	agree	strongly disagree	strongly disagree	neutral	strongly disagree	strongly disagree	agree	agree	agree	agree	agree	strongly agree	strongly agree	agree	strongly agree	strongly agree	agree	strongly disagree	agree	agree	agree	neutral	agree	neutral	agree	strongly disagree	agree	agree	agree	agree	agree	agree	strongly disagree	strongly disagree	strongly disagree	agree	strongly agree	strongly agree	agree	agree	agree
2022-03-31 12:59:40	male	between 18 and 40 years	postgraduate	Government employee	3 years and more	strongly agree	agree	strongly agree	strongly agree	strongly agree	strongly agree	strongly agree	agree	neutral	strongly disagree	agree	strongly disagree	agree	strongly agree	agree	strongly agree	agree	strongly agree	strongly agree	strongly disagree	strongly disagree	لا strongly agree	لا strongly agree	لا strongly agree	agree	neutral	agree	strongly disagree	strongly disagree	strongly agree	agree	strongly agree	agree	agree	strongly agree	agree	agree	strongly agree	agree	agree	strongly agree	agree	neutral	agree
2022-03-31 13:08:33	male	between 41 and 60 years	postgraduate	Government employee	3 years and more	agree	agree	agree	agree	agree	agree	agree	agree	agree	strongly agree	strongly agree	strongly agree	strongly agree	strongly agree	strongly agree	agree	strongly agree	strongly agree	strongly agree	strongly disagree	neutral	agree	strongly agree	neutral	strongly agree	agree	agree	agree	agree	agree	agree	agree	strongly agree	agree	neutral	neutral	strongly disagree	strongly disagree	agree	strongly agree	strongly agree	strongly disagree	strongly disagree	agree
2022-03-31 13:09:33	male	between 18 and 40 years	high school	private sector employee	from 2 to 3 years	neutral	agree	agree	agree	agree	agree	agree	agree	neutral	neutral	agree	agree	agree	agree	agree	agree	agree	agree	agree	agree	agree	agree	agree	agree	agree	agree	agree	agree	agree	agree	agree	agree	agree	agree	agree	agree	agree	agree	agree	agree	agree	agree	agree	agree
2022-03-31 13:10:13	male	between 41 and 60 years	bachelor	private sector employee	3 years and more	strongly agree	agree	agree	agree	agree	strongly agree	agree	agree	strongly disagree	agree	agree	agree	agree	strongly agree	strongly agree	agree	strongly agree	strongly agree	neutral	agree	agree	agree	agree	agree	agree	agree	agree	agree	agree	strongly agree	strongly agree	strongly agree	agree	agree	agree	neutral	neutral	agree	agree	agree	agree	neutral	agree	agree
2022-03-31 13:10:45	male	between 41 and 60 years	high school	Government employee	from 2 to 3 years	strongly agree	agree	agree	agree	agree	strongly agree	agree	agree	strongly disagree	agree	agree	agree	agree	agree	strongly agree	strongly agree	strongly agree	agree	strongly agree	agree	agree	agree	agree	agree	agree	agree	agree	agree	agree	agree	agree	agree	agree	agree	agree	agree	agree	agree	agree	strongly agree	strongly agree	agree	agree	agree
2022-03-31 13:11:19	male	between 18 and 40 years	high school	Government employee	3 years and more	strongly agree	strongly agree	strongly agree	strongly agree	strongly agree	strongly agree	strongly agree	strongly agree	agree	strongly agree	strongly agree	strongly agree	strongly agree	strongly agree	strongly agree	strongly agree	strongly agree	strongly agree	strongly agree	strongly agree	strongly agree	strongly agree	strongly agree	strongly agree	strongly agree	strongly agree	strongly agree	strongly agree	strongly agree	strongly agree	strongly agree	strongly agree	strongly agree	strongly agree	strongly agree	neutral	neutral	strongly agree	strongly agree	strongly agree	strongly agree	neutral	neutral	strongly agree
2022-03-31 13:12:02	male	between 41 and 60 years	high school	Government employee	3 years and more	agree	agree	agree	agree	agree	agree	strongly agree	agree	neutral	neutral	neutral	neutral	agree	neutral	neutral	agree	agree	agree	agree	neutral	neutral	neutral	agree	agree	neutral	neutral	neutral	agree	neutral	agree	agree	agree	agree	agree	agree	agree	neutral	agree	agree	agree	agree	neutral	neutral	neutral
2022-03-31 13:25:50	male	between 18 and 40 years	high school	Government employee	from 1 year to less than 2 years	strongly agree	strongly agree	agree	strongly agree	strongly agree	strongly agree	strongly agree	strongly agree	strongly agree	strongly agree	strongly agree	strongly agree	strongly agree	strongly agree	agree	agree	agree	agree	agree	agree	agree	agree	agree	agree	agree	agree	agree	agree	agree	agree	agree	agree	agree	agree	agree	agree	agree	agree	agree	agree	agree	agree	agree	agree
2022-03-31 13:26:38	male	between 41 and 60 years	postgraduate	Government employee	3 years and more	strongly agree	strongly agree	strongly agree	strongly agree	neutral	neutral	agree	strongly disagree	strongly disagree	strongly disagree	strongly disagree	strongly disagree	strongly disagree	strongly disagree	agree	strongly agree	strongly agree	strongly agree	strongly agree	strongly disagree	strongly disagree	strongly disagree	strongly disagree	strongly disagree	strongly disagree	strongly disagree	strongly disagree	neutral	strongly disagree	neutral	agree	strongly disagree	strongly disagree	strongly disagree	strongly disagree	strongly disagree	agree	agree	agree	agree	agree	agree	strongly disagree	agree
2022-03-31 13:33:13	male	between 41 and 60 years	bachelor	Government employee	3 years and more	strongly agree	strongly agree	strongly agree	strongly agree	agree	neutral	strongly disagree	neutral	لا strongly agree	لا strongly agree	strongly disagree	agree	agree	strongly agree	strongly agree	strongly agree	strongly agree	neutral	strongly agree	neutral	neutral	neutral	agree	agree	neutral	agree	neutral	neutral	strongly disagree	neutral	strongly disagree	strongly disagree	strongly disagree	agree	neutral	neutral	agree	agree	agree	agree	strongly disagree	agree	strongly agree	agree
2022-03-31 13:34:22	male	between 41 and 60 years	postgraduate	Government employee	3 years and more	agree	agree	agree	agree	agree	agree	agree	agree	agree	agree	agree	neutral	neutral	agree	agree	agree	agree	agree	agree	agree	agree	agree	neutral	agree	agree	agree	agree	agree	agree	strongly agree	agree	agree	agree	agree	agree	agree	strongly disagree	agree	agree	strongly agree	agree	agree	agree	agree
2022-03-31 13:39:59	male	between 18 and 40 years	bachelor	Government employee	3 years and more	strongly agree	strongly agree	strongly agree	strongly agree	strongly agree	agree	agree	agree	agree	agree	agree	neutral	agree	agree	agree	agree	agree	strongly agree	agree	agree	agree	agree	agree	agree	agree	agree	agree	agree	agree	neutral	agree	agree	agree	agree	agree	agree	agree	agree	agree	agree	agree	strongly agree	agree	agree
2022-03-31 13:48:02	male	between 18 and 40 years	high school	Government employee	3 years and more	agree	agree	agree	agree	agree	agree	neutral	neutral	neutral	strongly disagree	agree	agree	agree	agree	agree	agree	agree	agree	agree	strongly agree	neutral	neutral	strongly disagree	strongly disagree	agree	neutral	neutral	agree	strongly disagree	neutral	agree	agree	agree	agree	agree	strongly disagree	neutral	agree	strongly agree	strongly agree	strongly agree	agree	agree	strongly agree
2022-03-31 13:51:53	male	between 41 and 60 years	bachelor	Government employee	3 years and more	strongly agree	agree	strongly agree	agree	agree	strongly agree	agree	agree	neutral	agree	strongly agree	agree	neutral	strongly agree	strongly agree	strongly agree	strongly agree	agree	strongly agree	agree	agree	agree	agree	agree	neutral	agree	agree	agree	agree	agree	strongly agree	agree	neutral	agree	agree	agree	agree	agree	strongly agree	agree	agree	neutral	neutral	strongly disagree
2022-03-31 13:52:56	male	between 41 and 60 years	diploma	private sector employee	less than one year	strongly agree	strongly agree	strongly agree	strongly agree	agree	strongly disagree	neutral	strongly disagree	agree	agree	agree	agree	agree	agree	agree	agree	agree	strongly disagree	agree	agree	agree	agree	agree	agree	agree	agree	agree	agree	agree	agree	agree	agree	agree	agree	agree	agree	agree	agree	agree	agree	agree	agree	agree	strongly agree
2022-03-31 14:02:58	male	between 18 and 40 years	postgraduate	Government employee	3 years and more	agree	agree	agree	strongly disagree	neutral	agree	strongly disagree	agree	neutral	strongly disagree	agree	agree	agree	agree	agree	agree	agree	agree	agree	neutral	strongly disagree	neutral	neutral	agree	agree	agree	agree	agree	agree	agree	strongly agree	agree	strongly agree	agree	agree	strongly disagree	strongly disagree	neutral	neutral	agree	agree	strongly disagree	strongly disagree	agree
2022-03-31 14:03:19	male	between 18 and 40 years	high school	student	3 years and more	agree	strongly disagree	strongly agree	agree	strongly agree	neutral	strongly agree	لا strongly agree	لا strongly agree	لا strongly agree	strongly agree	strongly agree	strongly agree	strongly agree	strongly agree	strongly agree	strongly agree	strongly agree	agree	neutral	strongly disagree	strongly disagree	strongly agree	agree	strongly disagree	agree	لا strongly agree	لا strongly agree	strongly agree	agree	agree	neutral	agree	agree	agree	strongly agree	strongly agree	strongly agree	agree	agree	strongly agree	لا strongly agree	strongly agree	agree
2022-03-31 14:22:46	male	between 18 and 40 years	postgraduate	Government employee	3 years and more	strongly agree	strongly agree	strongly agree	strongly agree	agree	agree	agree	agree	agree	agree	agree	agree	agree	strongly agree	agree	agree	strongly agree	agree	strongly agree	strongly agree	strongly agree	agree	agree	strongly agree	agree	agree	agree	agree	agree	strongly agree	strongly agree	strongly agree	strongly agree	agree	agree	agree	agree	agree	agree	strongly agree	strongly agree	strongly agree	strongly agree	strongly agree
2022-03-31 14:23:34	male	between 41 and 60 years	high school	Government employee	less than one year	agree	agree	agree	neutral	agree	agree	neutral	neutral	neutral	agree	strongly agree	agree	neutral	strongly agree	strongly agree	agree	agree	agree	neutral	strongly agree	agree	agree	neutral	agree	neutral	neutral	agree	agree	neutral	neutral	neutral	neutral	neutral	agree	neutral	agree	agree	agree	agree	agree	agree	strongly disagree	agree	agree
2022-03-31 14:24:03	male	between 18 and 40 years	high school	Government employee	3 years and more	agree	agree	agree	agree	agree	agree	agree	strongly agree	neutral	agree	agree	agree	agree	strongly agree	strongly agree	strongly agree	strongly agree	strongly agree	strongly agree	agree	agree	neutral	agree	agree	agree	agree	agree	agree	agree	agree	strongly agree	strongly agree	strongly agree	strongly agree	strongly agree	strongly agree	agree	agree	agree	agree	agree	agree	agree	agree
2022-03-31 14:24:46	male	between 41 and 60 years	postgraduate	Government employee	3 years and more	agree	agree	agree	agree	agree	agree	neutral	neutral	strongly disagree	neutral	neutral	strongly disagree	agree	agree	agree	agree	agree	neutral	agree	neutral	neutral	neutral	strongly disagree	strongly disagree	neutral	neutral	neutral	agree	neutral	agree	neutral	agree	neutral	neutral	neutral	strongly disagree	strongly disagree	strongly disagree	neutral	neutral	neutral	لا strongly agree	strongly disagree	strongly disagree
2022-03-31 14:36:09	male	between 41 and 60 years	bachelor	Government employee	from 2 to 3 years	agree	agree	agree	agree	agree	agree	agree	agree	neutral	agree	agree	agree	agree	agree	agree	agree	agree	agree	agree	agree	agree	agree	agree	agree	agree	agree	agree	agree	agree	agree	agree	agree	agree	agree	agree	agree	agree	agree	agree	agree	agree	neutral	strongly disagree	agree
2022-03-31 14:49:20	male	between 41 and 60 years	postgraduate	Government employee	3 years and more	strongly agree	neutral	strongly agree	neutral	strongly agree	strongly agree	neutral	strongly agree	لا strongly agree	neutral	strongly agree	strongly agree	strongly agree	strongly agree	strongly agree	strongly agree	strongly agree	strongly agree	strongly agree	neutral	strongly disagree	neutral	neutral	neutral	لا strongly agree	لا strongly agree	agree	neutral	neutral	strongly agree	neutral	neutral	neutral	neutral	neutral	لا strongly agree	لا strongly agree	لا strongly agree	لا strongly agree	لا strongly agree	لا strongly agree	لا strongly agree	لا strongly agree	لا strongly agree
2022-03-31 14:50:06	male	between 18 and 40 years	bachelor	other	less than one year	strongly disagree	لا strongly agree	strongly agree	strongly agree	لا strongly agree	neutral	strongly agree	agree	strongly agree	agree	strongly disagree	strongly agree	agree	strongly agree	strongly agree	strongly disagree	لا strongly agree	strongly agree	agree	strongly agree	agree	strongly agree	neutral	strongly agree	agree	neutral	strongly disagree	strongly agree	agree	neutral	strongly disagree	strongly agree	agree	neutral	strongly disagree	strongly agree	agree	neutral	strongly disagree	strongly agree	agree	neutral	strongly disagree	strongly agree
2022-03-31 14:51:07	male	between 41 and 60 years	postgraduate	Government employee	3 years and more	strongly agree	agree	agree	neutral	agree	agree	strongly disagree	neutral	neutral	strongly disagree	neutral	لا strongly agree	strongly agree	agree	agree	agree	agree	agree	agree	agree	neutral	neutral	neutral	agree	لا strongly agree	neutral	neutral	neutral	strongly disagree	strongly disagree	neutral	strongly disagree	لا strongly agree	strongly disagree	neutral	لا strongly agree	neutral	neutral	agree	agree	agree	لا strongly agree	strongly agree	لا strongly agree
2022-03-31 14:59:24	female	between 18 and 40 years	bachelor	student	from 2 to 3 years	agree	agree	agree	agree	neutral	neutral	agree	agree	agree	agree	agree	agree	agree	agree	agree	strongly agree	agree	agree	agree	agree	agree	neutral	agree	neutral	neutral	agree	agree	agree	agree	agree	agree	neutral	neutral	agree	agree	agree	neutral	neutral	strongly agree	strongly agree	strongly agree	agree	neutral	neutral
2022-03-31 14:59:44	female	between 18 and 40 years	bachelor	Government employee	3 years and more	strongly agree	strongly agree	strongly agree	strongly agree	strongly agree	strongly agree	strongly agree	strongly agree	agree	agree	strongly agree	agree	strongly agree	agree	agree	strongly agree	strongly agree	strongly agree	agree	agree	strongly agree	agree	strongly agree	strongly agree	agree	agree	strongly agree	agree	strongly agree	agree	agree	strongly agree	agree	agree	strongly agree	strongly agree	strongly agree	agree	agree	agree	strongly agree	agree	strongly agree	strongly agree
2022-03-31 15:01:07	male	between 18 and 40 years	postgraduate	Government employee	3 years and more	strongly agree	strongly agree	strongly agree	strongly agree	agree	agree	strongly agree	neutral	agree	strongly disagree	agree	agree	strongly disagree	agree	agree	agree	agree	agree	agree	strongly disagree	agree	strongly disagree	strongly disagree	strongly disagree	neutral	neutral	neutral	neutral	neutral	agree	strongly disagree	strongly disagree	neutral	neutral	neutral	neutral	strongly disagree	agree	agree	neutral	neutral	strongly disagree	strongly disagree	strongly disagree
2022-03-31 15:08:37	male	between 41 and 60 years	high school	private sector employee	3 years and more	strongly agree	agree	agree	agree	strongly agree	agree	agree	agree	strongly disagree	neutral	agree	agree	neutral	agree	agree	agree	agree	agree	neutral	agree	neutral	agree	agree	neutral	strongly disagree	agree	agree	agree	لا strongly agree	agree	strongly disagree	strongly disagree	strongly disagree	agree	strongly disagree	neutral	agree	agree	neutral	agree	agree	neutral	strongly disagree	agree
2022-03-31 15:25:31	male	between 18 and 40 years	high school	student	from 1 year to less than 2 years	agree	agree	agree	agree	agree	agree	neutral	agree	agree	neutral	neutral	agree	agree	agree	agree	agree	agree	agree	agree	neutral	strongly agree	agree	agree	agree	agree	strongly agree	strongly agree	agree	agree	agree	agree	neutral	neutral	neutral	agree	neutral	agree	agree	agree	agree	agree	agree	neutral	agree
2022-03-31 16:10:29	male	between 18 and 40 years	postgraduate	student	from 2 to 3 years	agree	agree	neutral	neutral	agree	agree	neutral	neutral	neutral	neutral	agree	agree	strongly disagree	strongly disagree	agree	agree	neutral	agree	agree	agree	neutral	neutral	agree	neutral	strongly disagree	neutral	strongly disagree	neutral	strongly disagree	neutral	neutral	neutral	strongly disagree	neutral	neutral	agree	strongly disagree	strongly disagree	agree	agree	agree	لا strongly agree	agree	neutral
2022-03-31 16:19:33	male	between 18 and 40 years	high school	student	I have never used mobile echommerce applications	agree	agree	neutral	لا strongly agree	neutral	strongly disagree	neutral	strongly agree	strongly agree	agree	agree	agree	agree	agree	neutral	agree	agree	strongly agree	agree	neutral	agree	agree	strongly disagree	agree	neutral	neutral	agree	strongly disagree	neutral	agree	strongly disagree	agree	agree	agree	agree	agree	agree	agree	agree	agree	agree	agree	agree	agree
2022-03-31 16:47:07	female	between 18 and 40 years	bachelor	other	3 years and more	agree	agree	neutral	neutral	neutral	neutral	agree	agree	neutral	neutral	agree	agree	agree	strongly agree	strongly agree	strongly agree	agree	agree	agree	agree	agree	agree	agree	agree	agree	agree	agree	agree	agree	agree	agree	agree	agree	agree	agree	agree	agree	neutral	agree	neutral	agree	neutral	agree	neutral
2022-03-31 17:05:09	male	between 18 and 40 years	postgraduate	Government employee	3 years and more	agree	agree	agree	agree	agree	agree	neutral	neutral	strongly disagree	neutral	agree	agree	agree	agree	agree	agree	agree	agree	neutral	agree	agree	agree	neutral	neutral	neutral	agree	neutral	agree	neutral	agree	neutral	neutral	neutral	agree	agree	neutral	agree	agree	neutral	agree	agree	neutral	neutral	agree
2022-03-31 18:07:11	male	between 18 and 40 years	bachelor	student	3 years and more	agree	agree	strongly agree	strongly agree	strongly agree	strongly agree	strongly agree	agree	neutral	strongly disagree	agree	agree	strongly agree	strongly agree	strongly agree	strongly agree	strongly agree	strongly agree	strongly agree	strongly agree	agree	agree	strongly agree	strongly agree	strongly disagree	neutral	agree	agree	agree	agree	strongly agree	strongly agree	strongly agree	strongly agree	strongly agree	strongly agree	strongly agree	strongly agree	strongly agree	strongly agree	strongly agree	strongly disagree	strongly disagree	strongly agree
2022-03-31 18:18:49	male	between 18 and 40 years	postgraduate	Government employee	3 years and more	strongly agree	strongly agree	strongly agree	strongly agree	strongly agree	strongly agree	strongly agree	strongly agree	neutral	strongly agree	strongly agree	strongly agree	strongly agree	strongly agree	strongly agree	agree	neutral	agree	agree	strongly agree	agree	agree	neutral	agree	agree	neutral	neutral	neutral	neutral	neutral	agree	strongly agree	agree	agree	strongly agree	agree	agree	agree	agree	agree	agree	neutral	agree	neutral
2022-03-31 18:30:56	female	between 18 and 40 years	bachelor	Government employee	3 years and more	agree	agree	agree	agree	strongly agree	agree	strongly agree	strongly agree	agree	agree	agree	agree	strongly agree	strongly agree	strongly agree	strongly agree	agree	agree	strongly agree	strongly agree	strongly agree	strongly agree	strongly agree	agree	neutral	agree	agree	neutral	agree	neutral	neutral	agree	neutral	agree	agree	agree	neutral	agree	neutral	strongly agree	neutral	agree	agree	strongly agree
2022-03-31 18:31:02	female	between 18 and 40 years	high school	other	from 1 year to less than 2 years	agree	agree	agree	strongly agree	agree	agree	agree	agree	agree	strongly agree	agree	agree	agree	agree	agree	agree	agree	strongly agree	strongly agree	strongly agree	agree	agree	strongly agree	strongly agree	agree	agree	agree	agree	agree	agree	agree	strongly agree	agree	strongly agree	agree	agree	strongly agree	agree	agree	strongly agree	strongly agree	agree	agree	agree
2022-03-31 18:39:22	female	between 18 and 40 years	bachelor	other	I have never used mobile echommerce applications	strongly agree	agree	agree	agree	strongly disagree	agree	agree	agree	agree	agree	agree	agree	agree	strongly agree	agree	strongly agree	agree	agree	agree	agree	agree	agree	agree	agree	agree	agree	agree	agree	strongly agree	agree	strongly agree	agree	agree	agree	strongly agree	agree	agree	agree	agree	agree	agree	agree	agree	agree
2022-03-31 18:40:14	male	between 18 and 40 years	diploma	Government employee	less than one year	agree	agree	agree	agree	agree	agree	agree	agree	neutral	neutral	neutral	neutral	neutral	neutral	neutral	neutral	neutral	neutral	neutral	agree	agree	strongly agree	agree	agree	agree	agree	agree	agree	agree	agree	agree	agree	agree	agree	strongly agree	strongly disagree	neutral	neutral	neutral	neutral	neutral	neutral	neutral	neutral
2022-03-31 18:48:56	female	between 18 and 40 years	high school	other	I have never used mobile echommerce applications	agree	strongly agree	agree	agree	agree	agree	agree	neutral	strongly disagree	agree	agree	agree	agree	agree	agree	agree	agree	strongly disagree	strongly disagree	strongly disagree	strongly disagree	agree	agree	agree	strongly disagree	strongly disagree	agree	agree	agree	agree	agree	agree	agree	agree	agree	agree	agree	agree	agree	agree	agree	agree	agree	agree
2022-03-31 19:08:02	female	between 18 and 40 years	bachelor	private sector employee	from 2 to 3 years	strongly agree	strongly agree	strongly agree	agree	agree	neutral	agree	neutral	neutral	neutral	agree	strongly agree	neutral	strongly disagree	strongly disagree	neutral	strongly agree	strongly agree	agree	لا strongly agree	strongly disagree	strongly agree	لا strongly agree	strongly agree	strongly agree	strongly agree	strongly agree	strongly agree	neutral	agree	لا strongly agree	لا strongly agree	strongly agree	strongly agree	strongly agree	strongly agree	strongly agree	strongly agree	لا strongly agree	neutral	neutral	strongly agree	agree	strongly disagree
2022-03-31 19:14:01	female	between 18 and 40 years	bachelor	Government employee	from 2 to 3 years	agree	agree	agree	agree	agree	agree	agree	neutral	strongly disagree	neutral	agree	neutral	neutral	neutral	agree	agree	neutral	neutral	agree	agree	agree	agree	agree	agree	neutral	agree	neutral	neutral	agree	agree	agree	agree	agree	agree	neutral	neutral	agree	agree	neutral	agree	agree	strongly disagree	agree	neutral
2022-03-31 19:19:18	female	between 18 and 40 years	bachelor	Government employee	3 years and more	strongly agree	strongly agree	strongly agree	strongly agree	strongly agree	strongly agree	strongly agree	strongly agree	strongly agree	strongly agree	strongly agree	strongly agree	strongly agree	strongly agree	strongly agree	strongly agree	strongly agree	strongly agree	strongly agree	strongly agree	strongly agree	strongly agree	strongly agree	strongly agree	strongly agree	strongly agree	strongly agree	strongly agree	strongly agree	strongly agree	strongly agree	strongly agree	strongly agree	strongly agree	strongly agree	strongly agree	strongly agree	strongly agree	strongly agree	strongly agree	strongly agree	strongly agree	strongly agree	strongly agree
2022-03-31 20:50:32	female	between 18 and 40 years	bachelor	private sector employee	from 2 to 3 years	strongly agree	strongly agree	agree	strongly agree	agree	agree	agree	strongly agree	neutral	agree	agree	strongly agree	strongly agree	strongly agree	strongly agree	strongly agree	strongly agree	strongly agree	strongly agree	strongly agree	agree	neutral	strongly agree	agree	strongly agree	strongly agree	agree	agree	strongly agree	agree	agree	agree	strongly agree	strongly agree	strongly agree	strongly agree	strongly agree	agree	agree	strongly agree	strongly agree	strongly agree	strongly agree	strongly agree
2022-03-31 21:13:29	female	between 18 and 40 years	high school	student	3 years and more	agree	agree	strongly agree	agree	strongly agree	agree	agree	strongly agree	agree	agree	agree	agree	neutral	strongly agree	strongly agree	agree	agree	agree	agree	agree	agree	agree	agree	agree	agree	agree	agree	agree	agree	agree	agree	agree	agree	agree	agree	agree	agree	agree	agree	agree	agree	agree	agree	agree
2022-03-31 22:49:56	male	between 18 and 40 years	postgraduate	Government employee	3 years and more	neutral	neutral	neutral	neutral	neutral	neutral	neutral	neutral	neutral	neutral	neutral	neutral	neutral	neutral	neutral	neutral	neutral	neutral	neutral	neutral	neutral	neutral	neutral	neutral	neutral	neutral	neutral	neutral	neutral	neutral	neutral	neutral	neutral	neutral	neutral	neutral	neutral	neutral	neutral	neutral	neutral	neutral	neutral	neutral
2022-03-31 23:41:07	male	between 18 and 40 years	bachelor	Government employee	from 2 to 3 years	strongly agree	strongly agree	agree	strongly agree	strongly agree	strongly agree	agree	agree	neutral	strongly disagree	agree	agree	agree	agree	strongly agree	strongly agree	strongly agree	agree	strongly agree	agree	agree	neutral	strongly disagree	strongly disagree	neutral	agree	neutral	agree	strongly disagree	agree	agree	agree	strongly agree	agree	agree	agree	neutral	neutral	agree	agree	agree	neutral	strongly disagree	neutral
2022-03-31 23:50:16	male	between 18 and 40 years	bachelor	business man	3 years and more	strongly agree	strongly agree	strongly agree	strongly agree	neutral	neutral	agree	agree	neutral	strongly disagree	agree	agree	strongly agree	strongly agree	strongly agree	strongly agree	strongly agree	strongly agree	strongly agree	strongly agree	strongly agree	agree	strongly agree	neutral	neutral	agree	agree	neutral	neutral	strongly disagree	neutral	neutral	neutral	strongly agree	neutral	neutral	neutral	neutral	neutral	agree	agree	strongly agree	strongly agree	strongly agree
2022-04-01 00:10:06	male	between 41 and 60 years	postgraduate	Government employee	3 years and more	agree	agree	agree	agree	neutral	neutral	agree	agree	neutral	neutral	agree	neutral	agree	agree	agree	strongly agree	agree	agree	strongly agree	agree	agree	strongly disagree	neutral	neutral	agree	agree	agree	agree	neutral	strongly disagree	neutral	neutral	strongly disagree	agree	neutral	agree	neutral	agree	agree	agree	agree	لا strongly agree	لا strongly agree	strongly disagree
2022-04-01 01:51:59	female	between 41 and 60 years	postgraduate	other	3 years and more	strongly agree	strongly agree	strongly agree	strongly agree	strongly agree	strongly agree	strongly agree	strongly agree	strongly agree	strongly agree	strongly agree	strongly agree	strongly agree	strongly agree	agree	agree	agree	agree	agree	agree	agree	agree	agree	agree	agree	agree	agree	agree	agree	agree	agree	agree	agree	agree	agree	agree	agree	agree	agree	agree	agree	agree	agree	agree
2022-04-01 02:01:56	female	between 18 and 40 years	bachelor	other	3 years and more	agree	agree	agree	agree	agree	neutral	agree	strongly disagree	strongly disagree	strongly disagree	neutral	neutral	neutral	neutral	agree	agree	neutral	neutral	neutral	agree	agree	agree	agree	agree	neutral	neutral	neutral	neutral	neutral	neutral	neutral	neutral	neutral	neutral	agree	neutral	neutral	neutral	neutral	agree	agree	agree	agree	agree
2022-04-01 10:33:28	male	between 41 and 60 years	bachelor	Government employee	I have never used mobile echommerce applications	neutral	neutral	agree	agree	neutral	neutral	neutral	strongly disagree	strongly disagree	strongly disagree	neutral	neutral	neutral	strongly disagree	strongly disagree	neutral	neutral	strongly disagree	strongly disagree	neutral	neutral	neutral	neutral	strongly disagree	neutral	neutral	neutral	neutral	neutral	neutral	neutral	neutral	neutral	neutral	neutral	strongly disagree	strongly disagree	strongly disagree	neutral	neutral	neutral	neutral	neutral	neutral
2022-04-01 10:47:55	male	older than 60 years	diploma	private sector employee	from 2 to 3 years	agree	agree	agree	strongly agree	agree	agree	agree	neutral	agree	agree	agree	strongly agree	neutral	agree	agree	agree	agree	agree	agree	agree	agree	neutral	agree	agree	agree	agree	agree	agree	strongly disagree	neutral	agree	agree	agree	agree	agree	agree	neutral	agree	agree	agree	agree	agree	agree	agree
2022-04-01 11:38:28	male	between 18 and 40 years	postgraduate	Government employee	3 years and more	strongly agree	agree	strongly agree	strongly agree	strongly agree	strongly agree	agree	neutral	neutral	neutral	agree	agree	agree	agree	strongly agree	strongly agree	agree	strongly agree	strongly agree	agree	agree	neutral	agree	agree	agree	agree	agree	agree	agree	agree	strongly agree	agree	agree	agree	agree	agree	agree	agree	agree	agree	strongly agree	agree	agree	agree
2022-04-01 15:55:23	female	between 18 and 40 years	postgraduate	Government employee	3 years and more	strongly agree	strongly agree	strongly agree	strongly agree	agree	agree	agree	agree	agree	agree	agree	agree	agree	agree	agree	agree	agree	agree	agree	agree	agree	agree	agree	agree	agree	agree	agree	agree	agree	agree	agree	agree	agree	agree	agree	agree	agree	agree	agree	agree	agree	agree	agree	agree
2022-04-01 16:56:06	male	between 18 and 40 years	postgraduate	Government employee	from 2 to 3 years	neutral	neutral	neutral	neutral	neutral	neutral	neutral	neutral	neutral	neutral	neutral	neutral	neutral	neutral	neutral	neutral	neutral	neutral	neutral	neutral	neutral	neutral	neutral	neutral	strongly disagree	neutral	agree	agree	neutral	neutral	neutral	neutral	neutral	neutral	neutral	neutral	neutral	neutral	neutral	neutral	neutral	neutral	neutral	neutral
2022-04-01 17:54:37	female	between 18 and 40 years	postgraduate	Government employee	3 years and more	strongly agree	strongly agree	agree	neutral	strongly disagree	agree	agree	agree	strongly disagree	strongly disagree	strongly disagree	neutral	neutral	agree	agree	agree	agree	neutral	agree	agree	agree	neutral	neutral	neutral	neutral	strongly disagree	neutral	neutral	strongly disagree	agree	neutral	neutral	neutral	neutral	neutral	strongly disagree	strongly disagree	strongly disagree	agree	agree	agree	لا strongly agree	لا strongly agree	strongly disagree
2022-04-01 18:55:38	male	between 41 and 60 years	high school	other	I have never used mobile echommerce applications	strongly disagree	agree	neutral	strongly agree	strongly agree	strongly agree	strongly agree	strongly agree	strongly agree	strongly agree	strongly agree	strongly agree	strongly agree	strongly agree	strongly agree	strongly agree	strongly agree	strongly agree	strongly agree	strongly agree	strongly agree	strongly agree	strongly agree	strongly agree	strongly agree	strongly agree	strongly agree	strongly agree	strongly agree	strongly agree	strongly agree	strongly agree	strongly agree	strongly agree	strongly agree	strongly agree	strongly agree	strongly agree	strongly agree	strongly agree	strongly agree	strongly agree	strongly agree	strongly agree
2022-04-01 22:04:21	male	between 18 and 40 years	postgraduate	Government employee	3 years and more	strongly agree	strongly agree	strongly agree	strongly agree	agree	strongly agree	neutral	neutral	strongly disagree	strongly disagree	agree	agree	agree	agree	strongly agree	strongly agree	strongly agree	strongly agree	strongly agree	neutral	agree	agree	agree	agree	agree	agree	neutral	agree	agree	agree	agree	agree	strongly agree	strongly agree	strongly agree	strongly agree	strongly agree	agree	agree	strongly agree	strongly agree	strongly agree	neutral	neutral
2022-04-01 23:25:28	male	between 41 and 60 years	postgraduate	Government employee	3 years and more	agree	agree	agree	agree	agree	agree	agree	strongly disagree	لا strongly agree	لا strongly agree	strongly agree	strongly agree	agree	agree	agree	agree	agree	strongly disagree	agree	strongly disagree	agree	strongly disagree	strongly disagree	لا strongly agree	strongly disagree	strongly disagree	strongly disagree	strongly disagree	strongly disagree	agree	agree	agree	agree	agree	neutral	neutral	strongly disagree	لا strongly agree	لا strongly agree	strongly disagree	strongly disagree	لا strongly agree	لا strongly agree	لا strongly agree
2022-04-02 00:05:59	male	between 41 and 60 years	postgraduate	Government employee	from 1 year to less than 2 years	agree	agree	agree	agree	agree	agree	agree	neutral	neutral	agree	neutral	agree	agree	agree	agree	strongly agree	agree	strongly agree	agree	agree	agree	agree	agree	agree	neutral	agree	neutral	neutral	agree	agree	neutral	neutral	neutral	agree	agree	agree	strongly disagree	neutral	agree	agree	agree	strongly disagree	neutral	agree
2022-04-02 12:24:06	male	between 41 and 60 years	postgraduate	Government employee	from 2 to 3 years	agree	agree	agree	agree	strongly agree	strongly agree	strongly agree	strongly agree	agree	strongly agree	agree	agree	agree	strongly agree	agree	agree	agree	strongly agree	agree	agree	agree	agree	agree	agree	agree	agree	agree	agree	agree	agree	strongly agree	agree	neutral	agree	strongly agree	agree	strongly agree	agree	agree	strongly agree	agree	agree	agree	agree
2022-04-02 20:26:45	female	between 18 and 40 years	postgraduate	Government employee	3 years and more	strongly agree	agree	agree	agree	agree	strongly disagree	agree	neutral	strongly disagree	neutral	agree	agree	agree	strongly agree	strongly agree	strongly agree	strongly agree	strongly agree	strongly agree	strongly agree	strongly agree	strongly agree	neutral	strongly disagree	agree	strongly agree	neutral	neutral	strongly disagree	agree	agree	agree	agree	neutral	agree	agree	strongly disagree	strongly disagree	strongly disagree	strongly disagree	agree	لا strongly agree	neutral	agree
2022-04-03 13:36:07	male	between 18 and 40 years	postgraduate	Government employee	from 2 to 3 years	agree	agree	agree	agree	agree	agree	neutral	agree	neutral	neutral	neutral	agree	agree	agree	agree	agree	agree	agree	agree	neutral	neutral	neutral	neutral	neutral	neutral	agree	agree	agree	agree	agree	agree	agree	agree	agree	agree	agree	agree	neutral	agree	agree	agree	neutral	neutral	neutral
2022-04-04 15:17:09	male	between 41 and 60 years	postgraduate	Government employee	3 years and more	strongly agree	strongly agree	strongly agree	agree	agree	agree	agree	agree	agree	agree	agree	agree	agree	agree	agree	agree	agree	agree	agree	agree	agree	agree	agree	agree	agree	agree	agree	agree	agree	agree	agree	agree	agree	agree	agree	agree	agree	agree	agree	agree	agree	agree	agree	agree
2022-04-04 15:23:40	male	between 41 and 60 years	postgraduate	Government employee	3 years and more	strongly agree	strongly agree	agree	agree	agree	agree	agree	neutral	neutral	neutral	agree	agree	agree	strongly agree	strongly agree	strongly agree	strongly agree	strongly disagree	strongly agree	agree	agree	neutral	neutral	strongly disagree	agree	agree	neutral	neutral	neutral	neutral	agree	agree	agree	agree	agree	neutral	agree	neutral	neutral	agree	agree	strongly disagree	strongly disagree	neutral
2022-04-04 15:25:08	male	between 41 and 60 years	postgraduate	Government employee	3 years and more	strongly agree	strongly agree	agree	agree	agree	agree	agree	strongly agree	agree	agree	agree	agree	agree	agree	agree	agree	agree	agree	agree	agree	agree	agree	agree	agree	agree	agree	agree	agree	agree	agree	agree	agree	agree	agree	agree	agree	agree	agree	agree	agree	agree	agree	agree	agree
2022-04-04 15:25:30	male	between 41 and 60 years	postgraduate	Government employee	less than one year	neutral	لا strongly agree	strongly agree	neutral	strongly agree	neutral	agree	strongly disagree	strongly disagree	neutral	strongly disagree	neutral	neutral	strongly agree	لا strongly agree	strongly disagree	strongly disagree	strongly agree	strongly disagree	agree	لا strongly agree	strongly agree	strongly disagree	لا strongly agree	لا strongly agree	strongly disagree	strongly agree	agree	neutral	strongly disagree	لا strongly agree	لا strongly agree	strongly disagree	strongly disagree	neutral	neutral	strongly disagree	strongly disagree	strongly agree	strongly agree	strongly agree	strongly agree	agree	neutral
2022-04-04 15:26:23	male	between 41 and 60 years	postgraduate	Government employee	3 years and more	strongly agree	agree	strongly agree	strongly agree	agree	agree	agree	neutral	neutral	neutral	agree	agree	agree	agree	agree	agree	agree	agree	agree	agree	agree	agree	agree	agree	agree	agree	agree	agree	agree	strongly agree	agree	strongly agree	strongly agree	agree	agree	strongly agree	strongly agree	strongly agree	agree	agree	agree	agree	strongly disagree	neutral
2022-04-04 15:27:13	male	between 41 and 60 years	postgraduate	Government employee	3 years and more	strongly agree	strongly agree	strongly agree	strongly agree	agree	strongly agree	strongly agree	strongly agree	strongly disagree	agree	strongly agree	strongly agree	strongly agree	strongly agree	strongly agree	strongly agree	strongly agree	strongly agree	strongly agree	strongly agree	neutral	strongly agree	strongly agree	strongly agree	strongly agree	agree	agree	agree	agree	strongly agree	strongly agree	agree	agree	agree	agree	strongly disagree	neutral	strongly disagree	strongly agree	strongly agree	strongly agree	لا strongly agree	لا strongly agree	agree
2022-04-04 15:27:31	male	between 18 and 40 years	postgraduate	Government employee	3 years and more	agree	agree	agree	strongly agree	agree	agree	strongly agree	strongly disagree	neutral	agree	strongly agree	agree	agree	strongly agree	strongly agree	strongly agree	strongly agree	agree	strongly agree	agree	agree	agree	agree	agree	neutral	agree	agree	neutral	agree	neutral	strongly agree	agree	agree	agree	agree	agree	neutral	agree	strongly agree	strongly agree	strongly agree	neutral	agree	agree
2022-04-04 15:34:07	male	between 41 and 60 years	postgraduate	Government employee	3 years and more	agree	agree	strongly agree	strongly agree	strongly agree	strongly agree	strongly agree	neutral	neutral	agree	لا strongly agree	لا strongly agree	strongly agree	strongly agree	strongly agree	strongly agree	strongly agree	strongly agree	strongly agree	strongly agree	strongly agree	neutral	neutral	agree	neutral	strongly agree	agree	agree	agree	agree	agree	agree	agree	agree	agree	neutral	agree	strongly agree	strongly agree	strongly agree	strongly agree	لا strongly agree	strongly disagree	neutral
2022-04-04 15:34:42	male	between 41 and 60 years	postgraduate	Government employee	3 years and more	strongly agree	agree	agree	agree	strongly agree	agree	agree	neutral	agree	agree	agree	neutral	agree	strongly agree	strongly agree	strongly agree	strongly agree	strongly agree	strongly agree	neutral	neutral	neutral	neutral	agree	neutral	neutral	neutral	neutral	neutral	agree	agree	agree	agree	agree	agree	neutral	agree	neutral	strongly agree	strongly agree	strongly agree	strongly disagree	strongly disagree	neutral
2022-04-04 16:22:38	male	between 41 and 60 years	postgraduate	Government employee	3 years and more	neutral	agree	لا strongly agree	strongly disagree	strongly disagree	neutral	neutral	agree	neutral	neutral	neutral	agree	agree	neutral	agree	neutral	neutral	neutral	strongly disagree	agree	neutral	neutral	neutral	neutral	neutral	neutral	neutral	agree	neutral	strongly disagree	agree	agree	neutral	agree	neutral	neutral	neutral	neutral	neutral	strongly disagree	neutral	strongly disagree	strongly disagree	strongly disagree
2022-04-04 16:24:09	female	between 41 and 60 years	postgraduate	Government employee	3 years and more	strongly agree	agree	agree	agree	agree	agree	strongly agree	neutral	agree	agree	agree	agree	agree	strongly agree	strongly agree	strongly agree	strongly agree	strongly agree	strongly agree	agree	agree	agree	agree	agree	agree	agree	agree	agree	agree	agree	agree	agree	agree	strongly agree	agree	agree	agree	agree	agree	agree	agree	agree	agree	agree
2022-04-04 16:54:42	male	between 41 and 60 years	postgraduate	Government employee	3 years and more	agree	agree	agree	agree	agree	agree	agree	agree	agree	agree	agree	agree	agree	agree	agree	agree	agree	agree	agree	agree	agree	agree	agree	agree	agree	agree	agree	agree	agree	agree	agree	agree	agree	agree	agree	agree	agree	agree	neutral	agree	agree	strongly disagree	neutral	agree
2022-04-04 17:05:49	male	between 41 and 60 years	postgraduate	Government employee	3 years and more	strongly agree	strongly agree	agree	agree	agree	agree	neutral	strongly disagree	strongly disagree	لا strongly agree	neutral	neutral	agree	agree	agree	agree	agree	agree	agree	strongly disagree	strongly disagree	strongly disagree	لا strongly agree	لا strongly agree	strongly disagree	neutral	neutral	agree	neutral	agree	neutral	strongly disagree	neutral	neutral	agree	strongly disagree	لا strongly agree	neutral	agree	agree	agree	لا strongly agree	لا strongly agree	strongly disagree
2022-04-04 17:19:09	male	between 41 and 60 years	postgraduate	Government employee	3 years and more	agree	agree	agree	agree	agree	agree	agree	strongly disagree	agree	agree	agree	agree	agree	agree	agree	agree	agree	agree	agree	agree	strongly disagree	neutral	neutral	neutral	agree	agree	neutral	neutral	agree	agree	agree	agree	agree	agree	agree	strongly disagree	neutral	strongly disagree	neutral	neutral	neutral	strongly disagree	neutral	neutral
2022-04-04 17:23:55	male	between 41 and 60 years	postgraduate	Government employee	3 years and more	strongly agree	strongly agree	strongly agree	strongly agree	strongly agree	strongly agree	strongly agree	agree	agree	agree	strongly agree	strongly agree	strongly agree	strongly agree	strongly agree	strongly agree	strongly agree	strongly agree	strongly agree	agree	neutral	strongly disagree	strongly disagree	strongly disagree	agree	neutral	agree	neutral	strongly disagree	strongly agree	strongly agree	strongly agree	strongly agree	strongly agree	strongly agree	neutral	agree	agree	strongly agree	strongly agree	strongly agree	لا strongly agree	لا strongly agree	strongly disagree
2022-04-04 17:27:29	male	between 41 and 60 years	postgraduate	Government employee	3 years and more	strongly agree	agree	agree	strongly disagree	strongly disagree	agree	agree	agree	neutral	strongly disagree	agree	agree	agree	agree	strongly disagree	strongly disagree	strongly disagree	agree	strongly disagree	agree	neutral	strongly disagree	neutral	neutral	neutral	agree	neutral	neutral	neutral	agree	agree	agree	agree	agree	agree	agree	strongly disagree	agree	agree	agree	agree	strongly disagree	strongly disagree	strongly disagree
2022-04-04 17:40:26	male	between 18 and 40 years	postgraduate	Government employee	from 2 to 3 years	agree	agree	agree	agree	agree	neutral	neutral	strongly disagree	neutral	neutral	agree	neutral	agree	agree	agree	agree	agree	neutral	neutral	neutral	neutral	neutral	agree	neutral	لا strongly agree	strongly disagree	neutral	neutral	strongly disagree	neutral	neutral	neutral	strongly disagree	neutral	neutral	neutral	neutral	strongly disagree	لا strongly agree	neutral	neutral	لا strongly agree	لا strongly agree	لا strongly agree
2022-04-04 19:09:19	female	between 18 and 40 years	postgraduate	Government employee	3 years and more	agree	agree	agree	agree	agree	agree	agree	agree	neutral	agree	agree	agree	agree	agree	agree	agree	agree	agree	agree	agree	agree	agree	agree	agree	agree	agree	agree	agree	neutral	agree	agree	agree	agree	agree	agree	agree	agree	neutral	agree	agree	agree	neutral	neutral	agree
2022-04-04 19:35:47	male	between 41 and 60 years	postgraduate	Government employee	3 years and more	agree	agree	agree	agree	agree	agree	strongly agree	neutral	strongly disagree	strongly disagree	agree	agree	agree	strongly agree	strongly agree	strongly agree	strongly agree	agree	strongly agree	neutral	agree	agree	agree	neutral	neutral	strongly agree	agree	neutral	neutral	strongly agree	strongly agree	agree	neutral	neutral	neutral	agree	strongly disagree	strongly disagree	neutral	agree	agree	لا strongly agree	لا strongly agree	strongly disagree
2022-04-04 19:36:16	male	between 41 and 60 years	postgraduate	Government employee	from 2 to 3 years	agree	agree	agree	agree	strongly agree	agree	agree	agree	strongly disagree	strongly disagree	agree	agree	agree	agree	agree	agree	strongly agree	agree	strongly agree	agree	agree	neutral	agree	strongly agree	agree	agree	agree	agree	agree	strongly agree	strongly agree	strongly agree	strongly agree	strongly agree	strongly agree	agree	agree	agree	strongly agree	agree	strongly agree	strongly disagree	agree	agree
2022-04-04 19:58:44	male	between 41 and 60 years	postgraduate	Government employee	3 years and more	strongly agree	agree	strongly agree	strongly agree	agree	agree	agree	agree	strongly disagree	agree	agree	agree	strongly agree	strongly agree	strongly agree	strongly agree	strongly agree	agree	strongly agree	agree	agree	agree	agree	agree	agree	agree	agree	agree	agree	strongly agree	strongly agree	strongly agree	strongly agree	strongly agree	strongly agree	agree	strongly agree	agree	strongly agree	strongly agree	strongly agree	strongly agree	agree	agree
2022-04-04 22:03:49	male	between 18 and 40 years	postgraduate	Government employee	3 years and more	strongly agree	strongly agree	agree	strongly agree	agree	agree	neutral	neutral	agree	strongly disagree	agree	agree	strongly disagree	agree	strongly agree	strongly agree	strongly agree	agree	strongly agree	agree	strongly agree	strongly agree	strongly agree	agree	neutral	agree	agree	agree	agree	agree	agree	neutral	agree	strongly agree	strongly agree	strongly agree	strongly agree	strongly agree	strongly agree	strongly agree	strongly agree	strongly disagree	strongly disagree	agree
2022-04-04 23:15:35	male	between 41 and 60 years	postgraduate	Government employee	from 1 year to less than 2 years	agree	agree	agree	agree	neutral	agree	agree	agree	strongly disagree	strongly disagree	neutral	agree	neutral	agree	agree	agree	agree	strongly disagree	strongly disagree	strongly disagree	neutral	strongly disagree	strongly disagree	strongly disagree	agree	agree	neutral	strongly disagree	neutral	neutral	agree	agree	neutral	agree	neutral	strongly disagree	strongly disagree	strongly disagree	strongly disagree	strongly disagree	strongly disagree	strongly disagree	لا strongly agree	strongly disagree
2022-04-05 01:38:53	female	between 18 and 40 years	postgraduate	Government employee	3 years and more	strongly agree	neutral	strongly agree	strongly agree	agree	agree	agree	agree	agree	neutral	agree	agree	agree	agree	strongly agree	strongly agree	strongly agree	strongly agree	strongly agree	agree	agree	agree	agree	agree	agree	agree	agree	agree	agree	agree	agree	agree	agree	agree	agree	agree	neutral	agree	agree	agree	agree	strongly disagree	neutral	agree
2022-04-05 04:53:01	male	between 18 and 40 years	postgraduate	Government employee	I have never used mobile echommerce applications	strongly agree	strongly agree	strongly agree	strongly agree	strongly agree	strongly agree	strongly agree	strongly agree	strongly agree	strongly agree	agree	agree	agree	agree	agree	agree	agree	agree	agree	agree	agree	agree	strongly agree	strongly agree	strongly agree	strongly agree	agree	strongly agree	strongly agree	strongly agree	strongly agree	strongly agree	strongly agree	strongly agree	strongly agree	strongly agree	agree	agree	agree	strongly agree	neutral	neutral	neutral	agree
2022-04-05 05:14:43	male	between 41 and 60 years	postgraduate	Government employee	from 2 to 3 years	لا strongly agree	strongly disagree	strongly disagree	strongly disagree	strongly disagree	strongly disagree	strongly disagree	strongly disagree	strongly disagree	لا strongly agree	strongly disagree	neutral	strongly disagree	agree	agree	agree	neutral	neutral	strongly disagree	agree	neutral	agree	strongly disagree	strongly disagree	strongly agree	neutral	strongly disagree	strongly disagree	agree	agree	agree	neutral	neutral	strongly disagree	strongly disagree	neutral	agree	agree	neutral	neutral	agree	strongly disagree	strongly disagree	agree
2022-04-05 09:18:41	male	between 41 and 60 years	postgraduate	Government employee	from 2 to 3 years	agree	agree	agree	agree	strongly agree	strongly agree	strongly disagree	strongly disagree	strongly disagree	strongly disagree	agree	agree	agree	agree	agree	agree	agree	strongly disagree	agree	agree	neutral	neutral	agree	neutral	neutral	agree	neutral	agree	neutral	agree	agree	agree	agree	agree	agree	strongly disagree	strongly disagree	agree	agree	agree	agree	strongly disagree	agree	neutral
2022-04-05 13:48:57	female	between 18 and 40 years	bachelor	student	from 1 year to less than 2 years	strongly agree	strongly agree	strongly agree	strongly agree	strongly agree	strongly agree	strongly agree	strongly agree	strongly agree	strongly agree	strongly agree	strongly agree	strongly agree	strongly agree	strongly agree	strongly agree	strongly agree	strongly agree	strongly agree	strongly agree	strongly agree	strongly agree	strongly agree	strongly agree	strongly agree	strongly agree	strongly agree	strongly agree	strongly agree	neutral	strongly disagree	strongly agree	neutral	strongly agree	neutral	strongly agree	neutral	لا strongly agree	strongly agree	neutral	strongly agree	strongly agree	neutral	strongly agree
2022-04-05 13:49:24	female	between 18 and 40 years	high school	student	less than one year	agree	agree	agree	agree	agree	agree	agree	agree	agree	agree	agree	agree	agree	agree	agree	agree	agree	agree	agree	agree	agree	agree	agree	agree	agree	agree	neutral	neutral	agree	agree	neutral	agree	agree	neutral	neutral	agree	agree	agree	agree	agree	agree	agree	agree	لا strongly agree
2022-04-05 13:52:49	female	between 18 and 40 years	high school	student	3 years and more	strongly agree	strongly agree	strongly agree	strongly agree	strongly agree	strongly agree	strongly agree	strongly agree	strongly agree	strongly agree	strongly agree	strongly agree	strongly agree	strongly agree	strongly agree	strongly agree	strongly agree	strongly agree	strongly agree	strongly agree	strongly agree	strongly agree	strongly agree	strongly agree	strongly agree	strongly agree	strongly agree	strongly agree	strongly agree	strongly agree	strongly agree	strongly agree	strongly agree	strongly agree	strongly agree	strongly agree	strongly agree	strongly agree	strongly agree	strongly agree	strongly agree	strongly agree	strongly agree	strongly agree
2022-04-05 13:57:26	female	between 18 and 40 years	bachelor	student	3 years and more	strongly agree	agree	agree	neutral	agree	agree	strongly agree	strongly agree	agree	strongly disagree	agree	agree	neutral	strongly agree	strongly agree	strongly agree	strongly agree	agree	strongly agree	agree	agree	agree	strongly agree	agree	neutral	neutral	neutral	agree	neutral	neutral	strongly agree	strongly agree	strongly agree	strongly agree	strongly agree	agree	agree	neutral	agree	agree	agree	neutral	strongly disagree	agree
2022-04-05 13:57:39	female	between 18 and 40 years	bachelor	student	3 years and more	agree	agree	agree	agree	agree	agree	agree	strongly disagree	agree	neutral	agree	agree	strongly disagree	agree	agree	agree	strongly disagree	neutral	agree	agree	agree	agree	agree	agree	agree	neutral	neutral	neutral	neutral	neutral	agree	neutral	neutral	neutral	agree	agree	agree	neutral	agree	neutral	agree	strongly disagree	strongly disagree	agree
2022-04-05 14:11:17	female	between 18 and 40 years	bachelor	student	3 years and more	strongly agree	agree	agree	agree	strongly agree	agree	strongly agree	neutral	neutral	strongly agree	agree	agree	agree	strongly agree	strongly agree	strongly agree	strongly agree	agree	agree	strongly agree	neutral	strongly disagree	agree	neutral	neutral	agree	neutral	neutral	neutral	agree	agree	agree	strongly agree	strongly agree	strongly agree	agree	agree	neutral	strongly agree	agree	strongly agree	agree	agree	strongly agree
2022-04-05 14:58:01	male	between 41 and 60 years	postgraduate	Government employee	3 years and more	strongly agree	strongly agree	agree	agree	strongly disagree	neutral	agree	agree	agree	agree	agree	agree	agree	agree	strongly agree	strongly agree	neutral	strongly agree	agree	agree	agree	neutral	agree	strongly agree	agree	strongly agree	neutral	neutral	agree	strongly agree	strongly agree	neutral	agree	agree	agree	neutral	neutral	agree	neutral	agree	agree	لا strongly agree	strongly disagree	neutral
2022-04-05 16:51:08	male	between 41 and 60 years	postgraduate	Government employee	from 2 to 3 years	strongly agree	agree	strongly agree	strongly agree	strongly agree	strongly agree	strongly agree	agree	agree	neutral	agree	agree	agree	agree	agree	agree	agree	agree	agree	agree	neutral	neutral	neutral	neutral	agree	agree	agree	agree	neutral	agree	agree	agree	agree	agree	agree	neutral	neutral	neutral	agree	strongly agree	strongly agree	neutral	neutral	agree
2022-04-05 16:57:20	male	between 18 and 40 years	bachelor	student	I have never used mobile echommerce applications	agree	agree	agree	agree	agree	agree	agree	agree	agree	agree	agree	agree	agree	agree	agree	agree	agree	agree	agree	agree	agree	agree	agree	agree	agree	agree	agree	agree	agree	agree	agree	agree	agree	agree	agree	agree	agree	agree	agree	agree	agree	agree	agree	agree
2022-04-05 17:00:52	female	between 18 and 40 years	bachelor	student	from 1 year to less than 2 years	agree	strongly agree	strongly agree	agree	agree	agree	strongly agree	agree	neutral	agree	strongly agree	strongly agree	agree	agree	strongly agree	strongly agree	agree	neutral	strongly agree	strongly agree	agree	agree	agree	agree	agree	agree	agree	agree	agree	agree	strongly agree	strongly agree	strongly agree	strongly agree	agree	agree	agree	agree	agree	agree	agree	neutral	agree	neutral
2022-04-05 17:49:58	female	between 18 and 40 years	bachelor	student	3 years and more	agree	strongly agree	strongly agree	strongly agree	strongly agree	strongly agree	strongly agree	strongly agree	strongly agree	strongly agree	strongly agree	strongly agree	strongly agree	strongly agree	strongly agree	strongly agree	strongly agree	strongly agree	strongly agree	strongly agree	strongly agree	strongly agree	strongly agree	strongly agree	strongly agree	strongly agree	strongly agree	strongly agree	strongly agree	strongly agree	strongly agree	strongly agree	strongly agree	strongly agree	strongly agree	strongly agree	strongly agree	strongly agree	strongly agree	strongly agree	strongly agree	strongly agree	strongly agree	strongly agree
2022-04-05 18:26:22	female	between 18 and 40 years	bachelor	student	from 2 to 3 years	agree	agree	agree	agree	agree	agree	agree	agree	agree	agree	agree	agree	agree	agree	agree	agree	agree	agree	agree	agree	agree	agree	agree	agree	agree	agree	agree	agree	agree	agree	agree	agree	agree	agree	agree	strongly agree	strongly agree	strongly agree	strongly agree	strongly agree	agree	agree	agree	strongly agree
2022-04-05 21:40:24	female	between 18 and 40 years	bachelor	student	less than one year	strongly agree	strongly agree	strongly agree	strongly agree	strongly agree	strongly agree	strongly agree	strongly agree	strongly agree	strongly agree	strongly agree	strongly agree	strongly agree	strongly agree	strongly agree	strongly agree	strongly agree	strongly agree	strongly agree	strongly agree	strongly agree	strongly agree	strongly agree	strongly agree	strongly agree	strongly agree	strongly agree	strongly agree	strongly agree	strongly agree	strongly agree	strongly agree	strongly agree	strongly agree	strongly agree	strongly agree	strongly agree	strongly agree	strongly agree	strongly agree	strongly agree	strongly agree	strongly agree	strongly agree
2022-04-05 22:31:56	female	between 18 and 40 years	bachelor	student	3 years and more	strongly agree	strongly agree	strongly agree	strongly agree	agree	agree	strongly agree	agree	strongly agree	neutral	agree	strongly agree	strongly agree	strongly agree	strongly agree	strongly agree	strongly agree	agree	strongly agree	strongly agree	strongly agree	agree	strongly agree	agree	agree	neutral	agree	agree	agree	strongly agree	strongly agree	agree	agree	agree	agree	agree	strongly agree	strongly agree	strongly agree	strongly agree	strongly agree	neutral	neutral	agree
2022-04-06 00:08:49	male	between 18 and 40 years	bachelor	student	I have never used mobile echommerce applications	agree	agree	agree	agree	agree	agree	agree	agree	neutral	agree	agree	agree	agree	strongly agree	agree	agree	strongly agree	agree	agree	agree	agree	agree	strongly agree	strongly agree	strongly agree	agree	agree	strongly agree	strongly agree	strongly agree	strongly agree	strongly agree	agree	agree	agree	agree	agree	agree	neutral	agree	agree	agree	agree	agree
2022-04-06 00:51:59	female	between 18 and 40 years	high school	student	from 2 to 3 years	agree	agree	neutral	neutral	neutral	agree	agree	neutral	agree	agree	agree	agree	agree	agree	agree	agree	agree	agree	agree	agree	agree	agree	agree	agree	neutral	neutral	agree	agree	neutral	agree	agree	agree	agree	neutral	neutral	neutral	neutral	neutral	neutral	neutral	neutral	neutral	neutral	neutral
2022-04-06 01:03:32	male	between 18 and 40 years	bachelor	student	I have never used mobile echommerce applications	strongly agree	agree	strongly agree	agree	agree	agree	agree	agree	agree	agree	agree	agree	agree	agree	agree	agree	agree	agree	agree	agree	agree	agree	agree	agree	agree	agree	agree	agree	agree	agree	agree	agree	agree	agree	agree	agree	agree	agree	agree	agree	agree	agree	agree	agree
2022-04-06 01:57:56	male	between 18 and 40 years	high school	student	3 years and more	strongly agree	strongly agree	strongly agree	agree	neutral	neutral	strongly agree	strongly disagree	agree	neutral	neutral	agree	strongly disagree	neutral	strongly agree	strongly agree	strongly disagree	agree	strongly agree	strongly disagree	neutral	neutral	agree	agree	agree	neutral	neutral	agree	agree	agree	agree	neutral	agree	agree	agree	strongly disagree	لا strongly agree	neutral	agree	agree	agree	strongly disagree	strongly disagree	neutral
2022-04-06 02:30:16	male	between 18 and 40 years	postgraduate	Government employee	from 2 to 3 years	strongly agree	strongly agree	strongly agree	strongly agree	strongly agree	strongly agree	strongly agree	strongly agree	strongly agree	strongly agree	strongly agree	strongly agree	strongly agree	strongly agree	strongly agree	strongly agree	strongly agree	strongly agree	strongly agree	strongly agree	strongly agree	strongly agree	agree	agree	agree	agree	agree	agree	agree	agree	agree	agree	agree	agree	agree	agree	agree	agree	agree	agree	agree	agree	agree	agree
2022-04-06 02:47:49	male	between 18 and 40 years	high school	student	3 years and more	agree	agree	strongly agree	agree	agree	agree	agree	agree	agree	agree	agree	agree	agree	agree	agree	agree	agree	agree	agree	agree	agree	agree	agree	neutral	strongly agree	strongly agree	strongly agree	strongly agree	strongly agree	strongly agree	strongly agree	strongly agree	strongly agree	strongly agree	strongly agree	strongly agree	strongly agree	strongly agree	strongly agree	strongly agree	strongly agree	agree	agree	strongly agree
2022-04-06 04:05:35	male	between 18 and 40 years	bachelor	student	I have never used mobile echommerce applications	neutral	agree	neutral	neutral	neutral	neutral	neutral	agree	agree	neutral	agree	agree	agree	agree	agree	agree	neutral	neutral	neutral	neutral	neutral	neutral	neutral	neutral	neutral	neutral	neutral	neutral	neutral	neutral	neutral	neutral	neutral	neutral	neutral	neutral	neutral	neutral	neutral	neutral	neutral	neutral	neutral	neutral
2022-04-06 20:19:49	female	between 18 and 40 years	bachelor	student	from 1 year to less than 2 years	agree	neutral	agree	agree	strongly disagree	neutral	agree	neutral	neutral	neutral	neutral	agree	neutral	agree	agree	agree	agree	neutral	agree	agree	agree	neutral	agree	neutral	neutral	neutral	neutral	neutral	agree	agree	agree	agree	agree	agree	neutral	agree	neutral	strongly disagree	agree	neutral	neutral	agree	neutral	agree
2022-04-06 22:48:35	male	between 41 and 60 years	postgraduate	Government employee	I have never used mobile echommerce applications	neutral	neutral	neutral	neutral	neutral	neutral	neutral	neutral	neutral	neutral	agree	agree	neutral	neutral	neutral	neutral	neutral	neutral	neutral	neutral	agree	neutral	neutral	neutral	neutral	neutral	neutral	neutral	neutral	neutral	neutral	neutral	neutral	neutral	neutral	neutral	neutral	neutral	neutral	neutral	neutral	neutral	neutral	neutral
2022-04-07 05:51:28	male	between 18 and 40 years	postgraduate	Government employee	from 1 year to less than 2 years	agree	strongly agree	agree	strongly agree	neutral	agree	strongly agree	neutral	agree	neutral	agree	agree	neutral	strongly agree	agree	agree	agree	agree	agree	agree	neutral	strongly disagree	neutral	neutral	agree	agree	agree	neutral	neutral	neutral	agree	agree	neutral	agree	agree	strongly disagree	strongly disagree	strongly disagree	agree	neutral	neutral	neutral	strongly disagree	neutral
2022-04-07 13:31:43	male	between 18 and 40 years	bachelor	student	3 years and more	agree	agree	neutral	neutral	neutral	neutral	neutral	neutral	neutral	neutral	neutral	neutral	neutral	neutral	neutral	neutral	neutral	neutral	neutral	neutral	neutral	neutral	neutral	neutral	neutral	neutral	strongly disagree	strongly disagree	neutral	neutral	agree	agree	agree	agree	agree	agree	agree	agree	agree	agree	agree	agree	agree	agree
2022-04-07 14:43:37	male	between 18 and 40 years	diploma	other	from 1 year to less than 2 years	strongly agree	neutral	strongly agree	strongly agree	strongly agree	strongly agree	strongly agree	agree	neutral	strongly agree	strongly agree	agree	agree	strongly agree	strongly agree	strongly agree	strongly agree	strongly disagree	strongly agree	strongly agree	strongly agree	strongly agree	strongly agree	strongly agree	strongly agree	strongly agree	strongly agree	agree	agree	agree	agree	agree	neutral	agree	agree	agree	agree	neutral	neutral	agree	neutral	agree	neutral	agree
2022-04-07 16:07:08	male	between 41 and 60 years	postgraduate	Government employee	3 years and more	strongly agree	strongly agree	agree	agree	strongly agree	strongly agree	strongly agree	strongly agree	strongly disagree	neutral	strongly agree	strongly agree	strongly agree	strongly agree	strongly agree	strongly agree	strongly agree	strongly agree	strongly agree	strongly agree	strongly agree	strongly agree	strongly agree	strongly agree	neutral	neutral	agree	agree	agree	strongly disagree	neutral	neutral	strongly disagree	strongly disagree	strongly disagree	strongly disagree	strongly agree	strongly agree	strongly agree	strongly agree	strongly agree	agree	strongly agree	strongly agree
2022-04-07 23:40:11	female	between 18 and 40 years	diploma	student	3 years and more	strongly agree	strongly agree	strongly agree	strongly agree	strongly agree	strongly agree	strongly agree	strongly agree	strongly agree	strongly agree	strongly agree	strongly agree	strongly agree	strongly agree	strongly agree	strongly agree	strongly agree	strongly agree	strongly agree	strongly agree	strongly agree	strongly agree	strongly agree	strongly agree	strongly agree	strongly agree	strongly agree	strongly agree	strongly agree	strongly agree	strongly agree	strongly agree	strongly agree	strongly agree	strongly agree	strongly agree	strongly agree	strongly agree	strongly agree	strongly agree	strongly agree	strongly agree	strongly agree	strongly agree
2022-04-07 23:42:20	female	between 18 and 40 years	high school	student	3 years and more	strongly agree	agree	agree	agree	agree	agree	agree	strongly agree	strongly disagree	strongly agree	strongly agree	strongly agree	agree	strongly agree	strongly agree	strongly agree	strongly agree	strongly agree	agree	strongly agree	agree	agree	strongly agree	strongly agree	strongly agree	agree	strongly agree	agree	strongly agree	agree	strongly agree	agree	strongly agree	agree	strongly agree	agree	strongly agree	agree	strongly agree	strongly agree	strongly agree	strongly agree	strongly agree	strongly agree
2022-04-07 23:42:42	female	between 18 and 40 years	diploma	student	I have never used mobile echommerce applications	agree	agree	agree	agree	agree	agree	agree	agree	agree	agree	لا strongly agree	لا strongly agree	agree	agree	agree	neutral	neutral	neutral	neutral	neutral	neutral	strongly disagree	neutral	agree	neutral	neutral	neutral	neutral	neutral	neutral	neutral	neutral	neutral	neutral	neutral	neutral	neutral	neutral	neutral	neutral	strongly disagree	strongly disagree	strongly disagree	strongly disagree
2022-04-07 23:43:06	female	between 18 and 40 years	diploma	student	I have never used mobile echommerce applications	neutral	neutral	neutral	neutral	neutral	neutral	neutral	agree	agree	neutral	agree	neutral	agree	strongly agree	agree	agree	agree	neutral	neutral	neutral	neutral	neutral	neutral	neutral	neutral	neutral	neutral	neutral	neutral	neutral	neutral	neutral	neutral	neutral	neutral	neutral	neutral	neutral	neutral	neutral	neutral	neutral	neutral	neutral
2022-04-07 23:43:09	female	between 18 and 40 years	diploma	student	from 2 to 3 years	strongly agree	agree	strongly agree	agree	agree	agree	agree	agree	agree	strongly disagree	agree	agree	agree	agree	agree	agree	agree	agree	agree	agree	agree	agree	agree	agree	agree	agree	agree	agree	agree	agree	agree	agree	agree	agree	agree	agree	agree	agree	agree	agree	agree	agree	agree	agree
2022-04-07 23:43:56	female	between 18 and 40 years	diploma	student	from 1 year to less than 2 years	strongly agree	agree	strongly agree	strongly agree	agree	strongly agree	strongly agree	strongly agree	agree	neutral	strongly agree	strongly agree	strongly agree	strongly agree	strongly agree	strongly agree	strongly agree	strongly agree	strongly agree	strongly agree	strongly agree	strongly agree	strongly agree	strongly agree	strongly agree	strongly agree	strongly agree	strongly agree	strongly agree	strongly agree	strongly agree	strongly agree	strongly agree	strongly agree	strongly agree	strongly agree	strongly agree	strongly agree	strongly agree	strongly agree	strongly agree	strongly agree	strongly agree	strongly agree
2022-04-07 23:44:07	female	between 18 and 40 years	postgraduate	student	less than one year	strongly agree	strongly agree	strongly agree	strongly agree	strongly agree	strongly agree	strongly agree	strongly agree	strongly agree	strongly agree	strongly agree	strongly agree	strongly agree	strongly agree	strongly agree	strongly agree	strongly agree	strongly agree	strongly agree	strongly agree	strongly agree	strongly agree	strongly agree	strongly agree	strongly agree	strongly agree	strongly agree	strongly agree	strongly agree	strongly agree	strongly agree	agree	agree	strongly agree	strongly agree	strongly agree	strongly agree	strongly agree	strongly agree	strongly agree	strongly agree	strongly agree	strongly agree	strongly agree
2022-04-07 23:44:22	female	between 18 and 40 years	diploma	student	3 years and more	neutral	neutral	neutral	neutral	neutral	neutral	neutral	neutral	neutral	neutral	neutral	neutral	neutral	neutral	neutral	neutral	neutral	neutral	neutral	neutral	neutral	neutral	neutral	neutral	neutral	neutral	neutral	neutral	neutral	neutral	neutral	neutral	neutral	neutral	neutral	neutral	neutral	neutral	neutral	neutral	neutral	neutral	neutral	neutral
2022-04-07 23:45:05	female	between 18 and 40 years	diploma	student	from 1 year to less than 2 years	agree	agree	agree	strongly agree	agree	agree	agree	agree	agree	agree	agree	neutral	لا strongly agree	agree	agree	neutral	agree	agree	agree	agree	agree	agree	strongly disagree	neutral	agree	agree	agree	agree	agree	agree	agree	agree	agree	agree	agree	agree	agree	agree	neutral	agree	agree	strongly agree	strongly agree	strongly agree
2022-04-07 23:47:30	female	between 18 and 40 years	diploma	student	from 1 year to less than 2 years	strongly agree	strongly agree	strongly agree	strongly agree	لا strongly agree	agree	strongly agree	strongly agree	neutral	agree	agree	agree	agree	strongly agree	strongly agree	agree	agree	strongly agree	strongly agree	neutral	agree	agree	agree	agree	agree	agree	agree	agree	agree	agree	agree	agree	agree	agree	agree	agree	neutral	agree	agree	agree	agree	neutral	neutral	agree
2022-04-07 23:48:06	female	between 18 and 40 years	diploma	student	from 2 to 3 years	agree	agree	agree	agree	neutral	agree	agree	agree	agree	neutral	agree	strongly disagree	neutral	neutral	neutral	agree	agree	strongly disagree	strongly disagree	strongly agree	neutral	agree	agree	strongly agree	strongly agree	agree	لا strongly agree	strongly disagree	strongly agree	strongly agree	strongly agree	agree	agree	agree	agree	strongly disagree	neutral	agree	agree	strongly disagree	agree	strongly disagree	agree	strongly disagree
2022-04-07 23:48:07	female	between 18 and 40 years	high school	student	from 2 to 3 years	agree	agree	agree	agree	strongly agree	strongly agree	strongly agree	agree	neutral	neutral	agree	agree	neutral	agree	strongly agree	strongly agree	strongly agree	strongly disagree	strongly agree	neutral	agree	agree	neutral	neutral	neutral	agree	agree	agree	neutral	neutral	neutral	neutral	neutral	neutral	agree	agree	agree	neutral	strongly agree	neutral	neutral	strongly agree	neutral	agree
2022-04-07 23:49:22	female	between 18 and 40 years	diploma	student	3 years and more	agree	agree	agree	agree	strongly agree	strongly agree	strongly agree	strongly agree	strongly agree	strongly agree	strongly agree	strongly agree	strongly agree	strongly agree	strongly agree	strongly agree	strongly agree	strongly agree	strongly agree	strongly agree	strongly agree	strongly agree	strongly agree	strongly agree	strongly agree	strongly agree	strongly agree	strongly agree	strongly agree	strongly agree	strongly agree	strongly agree	strongly agree	strongly agree	strongly agree	strongly agree	strongly agree	strongly agree	strongly agree	strongly agree	strongly agree	strongly agree	strongly agree	strongly agree
2022-04-08 00:00:33	female	between 18 and 40 years	diploma	student	I have never used mobile echommerce applications	agree	agree	agree	agree	agree	agree	agree	agree	agree	agree	agree	agree	agree	agree	agree	agree	agree	agree	agree	agree	agree	agree	agree	agree	agree	agree	agree	agree	agree	agree	agree	agree	agree	agree	agree	agree	agree	agree	agree	agree	agree	agree	agree	agree
2022-04-08 00:07:11	female	between 18 and 40 years	diploma	student	I have never used mobile echommerce applications	strongly agree	strongly agree	strongly agree	strongly agree	strongly agree	strongly agree	strongly agree	strongly agree	strongly agree	strongly agree	strongly agree	strongly agree	strongly agree	strongly agree	strongly agree	strongly agree	strongly agree	strongly agree	strongly agree	strongly agree	strongly agree	strongly agree	strongly agree	strongly agree	strongly agree	strongly agree	strongly agree	strongly agree	strongly agree	strongly agree	strongly agree	strongly agree	strongly agree	strongly agree	strongly agree	strongly agree	strongly agree	strongly agree	strongly agree	strongly agree	strongly agree	strongly agree	strongly agree	strongly agree
2022-04-08 00:08:36	female	between 18 and 40 years	diploma	student	3 years and more	agree	agree	agree	agree	agree	agree	agree	agree	agree	agree	agree	agree	agree	agree	agree	agree	agree	agree	agree	agree	agree	agree	agree	agree	agree	agree	agree	agree	agree	agree	agree	agree	agree	agree	agree	agree	agree	agree	agree	agree	agree	agree	agree	agree
2022-04-08 00:17:34	female	between 18 and 40 years	diploma	student	I have never used mobile echommerce applications	agree	agree	agree	agree	agree	agree	agree	agree	agree	agree	agree	agree	agree	agree	agree	agree	agree	agree	agree	agree	agree	agree	agree	agree	agree	agree	agree	agree	agree	agree	agree	agree	agree	agree	agree	agree	agree	agree	agree	agree	agree	agree	agree	agree
2022-04-08 00:24:39	female	between 18 and 40 years	diploma	student	I have never used mobile echommerce applications	strongly agree	strongly agree	strongly agree	strongly agree	agree	agree	agree	agree	strongly disagree	strongly disagree	strongly disagree	strongly agree	strongly agree	agree	agree	agree	agree	agree	agree	agree	agree	agree	agree	agree	agree	agree	agree	agree	agree	agree	agree	strongly disagree	strongly disagree	strongly disagree	strongly disagree	strongly disagree	strongly disagree	agree	agree	agree	agree	agree	agree	agree
2022-04-08 00:28:11	female	between 18 and 40 years	diploma	student	3 years and more	agree	agree	neutral	neutral	strongly agree	strongly agree	agree	agree	agree	strongly agree	agree	strongly agree	neutral	neutral	neutral	agree	neutral	strongly disagree	agree	agree	agree	neutral	neutral	agree	agree	agree	agree	agree	agree	لا strongly agree	agree	strongly agree	strongly disagree	strongly disagree	agree	لا strongly agree	لا strongly agree	agree	strongly agree	strongly agree	agree	strongly agree	strongly agree	agree
2022-04-08 00:33:04	female	between 18 and 40 years	high school	student	from 2 to 3 years	agree	agree	agree	neutral	neutral	agree	agree	agree	neutral	agree	neutral	neutral	agree	strongly agree	agree	agree	neutral	neutral	neutral	strongly agree	neutral	agree	agree	agree	neutral	neutral	agree	agree	agree	neutral	neutral	neutral	neutral	agree	neutral	neutral	neutral	agree	neutral	agree	neutral	neutral	neutral	neutral
2022-04-08 00:40:44	female	between 18 and 40 years	diploma	student	I have never used mobile echommerce applications	strongly agree	agree	strongly agree	agree	strongly agree	agree	strongly agree	agree	strongly agree	agree	strongly agree	agree	strongly agree	agree	strongly agree	agree	strongly agree	agree	strongly agree	agree	strongly agree	agree	strongly agree	agree	strongly agree	agree	strongly agree	agree	strongly agree	agree	strongly agree	agree	strongly agree	agree	strongly agree	agree	strongly agree	agree	strongly agree	agree	strongly agree	agree	strongly agree	agree
2022-04-08 01:04:39	female	between 18 and 40 years	diploma	student	from 1 year to less than 2 years	strongly agree	strongly disagree	neutral	neutral	strongly disagree	strongly disagree	strongly agree	neutral	agree	neutral	strongly agree	agree	strongly agree	strongly agree	strongly agree	agree	agree	strongly disagree	strongly agree	agree	neutral	agree	agree	neutral	strongly agree	strongly agree	strongly agree	agree	agree	agree	agree	agree	strongly agree	strongly agree	neutral	agree	strongly agree	agree	strongly agree	agree	strongly agree	strongly agree	agree	agree
2022-04-08 01:33:11	female	between 18 and 40 years	diploma	student	from 2 to 3 years	strongly agree	agree	agree	agree	agree	agree	strongly agree	strongly agree	neutral	agree	neutral	neutral	neutral	strongly agree	strongly agree	strongly agree	agree	strongly agree	agree	agree	agree	agree	agree	agree	agree	agree	agree	agree	strongly agree	agree	neutral	strongly agree	strongly agree	agree	agree	agree	agree	agree	strongly disagree	strongly disagree	agree	neutral	neutral	neutral
2022-04-08 01:46:26	female	between 18 and 40 years	diploma	student	3 years and more	strongly agree	strongly agree	strongly agree	strongly agree	strongly agree	strongly agree	strongly agree	strongly agree	strongly agree	strongly agree	strongly agree	strongly agree	strongly agree	strongly agree	strongly agree	strongly agree	agree	agree	agree	agree	agree	agree	agree	agree	agree	agree	agree	agree	agree	agree	agree	agree	agree	agree	agree	agree	agree	agree	agree	agree	agree	agree	agree	agree
2022-04-08 02:01:56	female	between 18 and 40 years	diploma	student	less than one year	agree	neutral	neutral	neutral	agree	agree	agree	neutral	neutral	agree	neutral	neutral	agree	agree	agree	agree	agree	agree	agree	agree	agree	agree	agree	agree	agree	agree	agree	agree	agree	agree	agree	agree	agree	agree	agree	agree	agree	agree	agree	agree	agree	agree	agree	agree
2022-04-08 02:05:49	female	between 18 and 40 years	diploma	student	I have never used mobile echommerce applications	agree	agree	agree	agree	strongly agree	strongly agree	strongly agree	agree	agree	agree	agree	agree	agree	agree	agree	agree	agree	agree	agree	agree	agree	agree	agree	agree	agree	agree	agree	agree	agree	agree	agree	agree	agree	agree	agree	agree	agree	agree	agree	agree	agree	agree	agree	strongly disagree
2022-04-08 02:23:34	female	less than 18 years	diploma	student	I have never used mobile echommerce applications	neutral	strongly disagree	strongly agree	neutral	strongly agree	strongly disagree	neutral	neutral	strongly disagree	agree	agree	strongly disagree	agree	agree	agree	agree	agree	agree	agree	agree	agree	strongly disagree	agree	agree	agree	agree	agree	agree	agree	agree	agree	agree	agree	agree	agree	agree	agree	agree	agree	agree	agree	agree	agree	agree
2022-04-08 03:47:09	female	between 18 and 40 years	diploma	student	3 years and more	strongly agree	strongly agree	agree	strongly agree	strongly agree	strongly agree	strongly agree	agree	neutral	neutral	agree	strongly agree	agree	strongly agree	strongly agree	strongly agree	strongly agree	agree	strongly agree	agree	strongly agree	strongly agree	strongly agree	agree	strongly agree	agree	strongly agree	strongly agree	agree	strongly agree	strongly agree	strongly agree	strongly agree	strongly agree	strongly agree	strongly agree	strongly agree	strongly agree	neutral	strongly agree	strongly agree	neutral	agree	agree
2022-04-08 04:21:21	female	between 18 and 40 years	high school	student	I have never used mobile echommerce applications	strongly agree	strongly agree	strongly agree	strongly agree	strongly agree	strongly agree	strongly agree	strongly disagree	strongly agree	strongly agree	strongly agree	strongly agree	strongly agree	strongly agree	strongly agree	strongly agree	strongly agree	strongly agree	strongly agree	strongly agree	strongly agree	strongly agree	strongly agree	strongly disagree	strongly agree	strongly agree	strongly agree	strongly agree	strongly agree	strongly agree	strongly agree	strongly agree	لا strongly agree	strongly agree	strongly agree	strongly agree	strongly agree	strongly agree	strongly agree	strongly agree	strongly agree	strongly agree	strongly agree	strongly agree
2022-04-08 13:48:14	female	between 18 and 40 years	high school	student	3 years and more	strongly agree	strongly agree	agree	agree	neutral	agree	strongly agree	agree	strongly disagree	strongly disagree	strongly disagree	neutral	strongly agree	strongly agree	strongly agree	strongly agree	strongly agree	strongly agree	strongly agree	strongly agree	strongly agree	strongly agree	strongly agree	strongly agree	strongly agree	strongly agree	neutral	strongly agree	strongly agree	strongly agree	strongly agree	لا strongly agree	neutral	strongly agree	strongly agree	strongly agree	strongly agree	strongly agree	strongly agree	strongly agree	strongly disagree	لا strongly agree	لا strongly agree	لا strongly agree
2022-04-08 13:51:09	female	between 18 and 40 years	bachelor	student	from 2 to 3 years	agree	agree	neutral	agree	neutral	neutral	agree	agree	neutral	neutral	agree	agree	neutral	agree	strongly agree	strongly agree	strongly agree	agree	agree	agree	agree	agree	agree	agree	strongly agree	strongly agree	strongly agree	agree	agree	agree	agree	agree	agree	agree	agree	agree	agree	agree	agree	agree	agree	agree	agree	strongly agree
2022-04-08 14:00:38	female	between 18 and 40 years	bachelor	student	3 years and more	strongly agree	strongly agree	strongly agree	strongly agree	strongly agree	strongly agree	strongly agree	strongly agree	strongly agree	strongly agree	strongly agree	strongly agree	strongly agree	strongly agree	strongly agree	strongly agree	strongly agree	strongly agree	strongly agree	strongly agree	strongly agree	strongly agree	strongly agree	strongly agree	strongly agree	strongly agree	strongly agree	strongly agree	strongly agree	strongly agree	strongly agree	strongly agree	strongly agree	strongly agree	strongly agree	strongly agree	strongly agree	strongly agree	strongly agree	strongly agree	strongly agree	strongly agree	strongly agree	strongly agree
2022-04-08 14:23:09	female	between 18 and 40 years	bachelor	student	I have never used mobile echommerce applications	agree	agree	agree	agree	agree	agree	agree	agree	agree	agree	agree	agree	agree	agree	agree	agree	agree	agree	agree	agree	agree	agree	agree	agree	agree	agree	agree	agree	agree	agree	agree	agree	agree	agree	agree	agree	agree	agree	agree	agree	agree	agree	agree	agree
2022-04-08 14:27:35	female	between 18 and 40 years	bachelor	student	from 2 to 3 years	strongly agree	neutral	neutral	strongly agree	strongly agree	strongly agree	strongly agree	strongly agree	agree	neutral	agree	strongly agree	strongly agree	strongly agree	strongly agree	strongly agree	strongly agree	strongly agree	strongly agree	strongly agree	strongly agree	strongly agree	strongly agree	agree	strongly agree	strongly agree	agree	strongly agree	strongly agree	strongly agree	strongly agree	strongly agree	strongly agree	strongly agree	strongly agree	agree	agree	strongly agree	strongly agree	strongly agree	agree	agree	agree	strongly agree
2022-04-08 16:22:13	female	between 18 and 40 years	diploma	student	less than one year	agree	agree	agree	strongly agree	agree	agree	agree	neutral	neutral	neutral	agree	agree	agree	agree	agree	agree	agree	agree	agree	agree	agree	agree	agree	agree	agree	agree	agree	agree	agree	agree	agree	agree	agree	agree	agree	agree	agree	agree	agree	agree	agree	agree	agree	agree
2022-04-08 16:44:28	female	between 18 and 40 years	bachelor	student	I have never used mobile echommerce applications	strongly agree	strongly agree	strongly agree	strongly agree	strongly agree	strongly agree	strongly agree	strongly agree	strongly agree	strongly agree	strongly agree	strongly agree	strongly agree	strongly agree	strongly agree	strongly agree	strongly agree	strongly agree	strongly agree	strongly agree	strongly agree	strongly agree	strongly agree	strongly agree	strongly agree	strongly agree	strongly agree	strongly agree	strongly agree	strongly agree	strongly agree	strongly agree	strongly agree	strongly agree	strongly agree	strongly agree	strongly agree	strongly agree	strongly agree	strongly agree	strongly agree	strongly agree	strongly agree	strongly agree
2022-04-08 17:04:07	female	between 18 and 40 years	bachelor	student	from 2 to 3 years	agree	agree	agree	neutral	agree	agree	agree	neutral	neutral	strongly disagree	agree	agree	agree	agree	agree	agree	agree	neutral	agree	agree	agree	neutral	agree	neutral	neutral	agree	neutral	neutral	neutral	neutral	agree	agree	neutral	neutral	neutral	neutral	neutral	neutral	agree	agree	agree	neutral	neutral	agree
2022-04-08 18:04:59	female	between 18 and 40 years	bachelor	student	3 years and more	strongly agree	strongly agree	strongly agree	strongly agree	strongly agree	strongly agree	strongly agree	strongly agree	strongly agree	strongly agree	strongly agree	strongly agree	strongly agree	strongly agree	strongly agree	strongly agree	strongly agree	strongly agree	strongly agree	strongly agree	strongly agree	strongly agree	strongly agree	strongly agree	strongly agree	strongly agree	strongly agree	strongly agree	strongly agree	strongly agree	strongly agree	strongly agree	strongly agree	strongly agree	strongly agree	strongly agree	strongly agree	strongly agree	strongly agree	strongly agree	strongly agree	strongly agree	strongly agree	strongly agree
2022-04-08 18:25:27	female	between 18 and 40 years	bachelor	student	3 years and more	strongly agree	strongly agree	strongly agree	strongly agree	strongly agree	strongly agree	strongly agree	strongly agree	strongly agree	strongly agree	strongly agree	strongly agree	strongly agree	strongly agree	strongly agree	strongly agree	strongly agree	strongly agree	strongly agree	strongly agree	strongly agree	strongly agree	strongly agree	strongly agree	strongly agree	strongly agree	strongly agree	strongly agree	strongly agree	strongly agree	strongly agree	strongly agree	strongly agree	strongly agree	strongly agree	strongly agree	strongly agree	strongly agree	strongly agree	strongly agree	strongly agree	strongly agree	strongly agree	strongly agree
2022-04-08 19:20:21	female	between 18 and 40 years	bachelor	student	I have never used mobile echommerce applications	neutral	agree	agree	agree	neutral	neutral	agree	agree	neutral	neutral	agree	neutral	agree	agree	neutral	agree	agree	neutral	agree	agree	neutral	agree	neutral	agree	agree	neutral	strongly disagree	neutral	agree	agree	agree	agree	agree	agree	neutral	agree	agree	agree	agree	neutral	agree	strongly disagree	agree	agree
2022-04-08 19:40:29	female	between 18 and 40 years	bachelor	student	3 years and more	agree	agree	agree	agree	strongly agree	strongly agree	agree	strongly agree	agree	agree	neutral	agree	agree	agree	agree	agree	agree	agree	strongly agree	agree	agree	agree	agree	agree	agree	agree	agree	agree	agree	agree	strongly agree	agree	agree	agree	agree	agree	agree	neutral	agree	agree	agree	neutral	agree	agree
2022-04-08 21:38:08	female	between 18 and 40 years	diploma	student	I have never used mobile echommerce applications	agree	neutral	strongly disagree	neutral	strongly disagree	strongly disagree	neutral	لا strongly agree	neutral	strongly disagree	neutral	neutral	neutral	neutral	neutral	neutral	neutral	agree	neutral	neutral	agree	agree	agree	strongly agree	agree	agree	agree	agree	agree	agree	agree	agree	agree	agree	agree	agree	neutral	agree	neutral	agree	neutral	neutral	neutral	agree
2022-04-08 22:34:40	female	between 18 and 40 years	bachelor	student	3 years and more	strongly agree	strongly agree	strongly agree	strongly agree	strongly agree	strongly agree	strongly agree	strongly agree	strongly agree	strongly agree	agree	strongly agree	agree	strongly agree	agree	agree	strongly agree	agree	agree	agree	strongly agree	strongly agree	agree	strongly agree	strongly agree	agree	strongly agree	agree	agree	strongly agree	strongly agree	agree	strongly agree	agree	strongly agree	agree	strongly agree	agree	strongly agree	agree	strongly agree	agree	strongly agree	strongly agree
2022-04-08 23:57:03	female	between 18 and 40 years	bachelor	student	I have never used mobile echommerce applications	agree	agree	agree	agree	agree	agree	agree	agree	agree	agree	agree	agree	agree	agree	agree	strongly disagree	strongly disagree	strongly disagree	strongly disagree	strongly disagree	strongly disagree	strongly disagree	neutral	neutral	neutral	neutral	agree	strongly disagree	neutral	agree	agree	neutral	strongly disagree	neutral	neutral	strongly disagree	strongly disagree	strongly disagree	agree	agree	agree	agree	agree	agree
2022-04-09 14:17:44	male	between 41 and 60 years	postgraduate	Government employee	3 years and more	strongly agree	strongly agree	strongly agree	strongly agree	strongly agree	strongly agree	strongly agree	strongly agree	neutral	strongly agree	strongly agree	strongly agree	strongly agree	strongly agree	strongly agree	strongly agree	strongly agree	strongly agree	strongly agree	strongly agree	strongly agree	strongly agree	strongly agree	strongly agree	strongly agree	strongly agree	strongly agree	agree	agree	strongly agree	strongly agree	strongly agree	strongly agree	strongly agree	strongly agree	strongly agree	strongly agree	strongly agree	strongly agree	strongly agree	strongly agree	agree	strongly agree	strongly agree
2022-04-09 16:13:16	female	between 18 and 40 years	bachelor	student	3 years and more	agree	agree	agree	agree	agree	agree	agree	agree	neutral	neutral	agree	agree	strongly agree	agree	agree	agree	agree	agree	agree	agree	agree	neutral	agree	neutral	agree	agree	agree	agree	agree	agree	strongly agree	agree	agree	agree	agree	agree	agree	agree	agree	strongly agree	agree	agree	agree	agree
2022-04-10 01:29:00	male	between 18 and 40 years	postgraduate	Government employee	3 years and more	strongly agree	strongly agree	strongly agree	strongly agree	strongly agree	agree	agree	agree	strongly agree	agree	agree	agree	strongly agree	strongly agree	agree	strongly agree	agree	strongly agree	agree	agree	strongly agree	strongly agree	agree	strongly agree	strongly agree	agree	agree	neutral	agree	agree	agree	agree	strongly agree	agree	agree	agree	strongly agree	agree	agree	agree	agree	agree	agree	agree
2022-04-11 04:05:20	female	between 18 and 40 years	diploma	student	I have never used mobile echommerce applications	neutral	neutral	neutral	neutral	neutral	neutral	neutral	neutral	neutral	neutral	neutral	neutral	neutral	neutral	neutral	neutral	neutral	neutral	neutral	neutral	neutral	neutral	neutral	neutral	neutral	neutral	neutral	neutral	neutral	neutral	neutral	neutral	neutral	neutral	neutral	neutral	neutral	neutral	neutral	neutral	neutral	neutral	neutral	neutral
2022-04-16 01:45:43	female	between 18 and 40 years	bachelor	private sector employee	3 years and more	strongly agree	strongly agree	strongly agree	strongly agree	strongly agree	strongly agree	strongly agree	strongly agree	strongly agree	strongly agree	strongly agree	strongly agree	strongly agree	strongly agree	strongly agree	strongly agree	strongly agree	strongly agree	strongly agree	strongly agree	strongly agree	strongly agree	strongly agree	strongly agree	strongly agree	strongly agree	strongly agree	strongly agree	strongly agree	strongly agree	strongly agree	strongly agree	strongly agree	strongly agree	strongly agree	strongly agree	strongly agree	strongly agree	agree	strongly agree	strongly agree	strongly agree	strongly agree	strongly agree
2022-04-16 03:34:27	female	between 18 and 40 years	bachelor	other	from 1 year to less than 2 years	strongly agree	strongly agree	strongly agree	strongly agree	strongly agree	strongly agree	strongly agree	strongly agree	strongly agree	strongly agree	strongly agree	strongly agree	strongly agree	strongly agree	strongly agree	strongly agree	strongly agree	strongly agree	strongly agree	strongly agree	strongly agree	strongly agree	strongly agree	strongly agree	strongly agree	strongly agree	strongly agree	strongly agree	strongly agree	strongly agree	strongly agree	strongly agree	strongly agree	strongly agree	strongly agree	strongly agree	strongly agree	strongly agree	strongly agree	strongly agree	strongly agree	strongly agree	strongly agree	strongly agree
2022-04-16 03:50:32	female	between 18 and 40 years	bachelor	other	3 years and more	strongly agree	strongly agree	strongly agree	strongly agree	strongly agree	strongly agree	strongly agree	strongly agree	strongly agree	strongly agree	strongly agree	strongly agree	strongly agree	strongly agree	strongly agree	strongly agree	strongly agree	strongly agree	strongly agree	strongly agree	strongly agree	strongly agree	strongly agree	strongly agree	strongly agree	strongly agree	strongly agree	strongly agree	strongly agree	strongly agree	strongly agree	strongly agree	strongly agree	strongly agree	strongly agree	strongly agree	strongly agree	strongly agree	strongly agree	strongly agree	strongly agree	strongly agree	strongly agree	strongly agree
2022-04-16 18:15:28	female	between 18 and 40 years	bachelor	student	3 years and more	strongly agree	strongly agree	strongly agree	strongly agree	strongly agree	strongly agree	strongly agree	strongly agree	strongly agree	strongly agree	strongly agree	strongly agree	strongly agree	strongly agree	strongly agree	strongly agree	strongly agree	strongly agree	strongly agree	strongly agree	strongly agree	strongly agree	strongly agree	strongly agree	strongly agree	strongly agree	strongly agree	strongly agree	strongly agree	strongly agree	strongly agree	strongly agree	strongly agree	strongly agree	strongly agree	strongly agree	strongly agree	strongly agree	strongly agree	strongly agree	strongly agree	strongly agree	strongly agree	strongly agree
2022-04-16 19:02:04	male	between 18 and 40 years	bachelor	student	I have never used mobile echommerce applications	agree	agree	strongly disagree	neutral	agree	neutral	agree	strongly agree	strongly agree	لا strongly agree	strongly agree	strongly agree	strongly agree	strongly agree	strongly agree	agree	agree	strongly disagree	لا strongly agree	agree	agree	agree	agree	agree	agree	agree	agree	agree	agree	agree	agree	agree	agree	agree	agree	agree	agree	agree	agree	neutral	neutral	agree	neutral	strongly disagree
2022-04-16 19:02:05	male	between 18 and 40 years	bachelor	student	from 1 year to less than 2 years	agree	agree	agree	agree	strongly agree	agree	agree	agree	strongly agree	agree	agree	agree	agree	agree	agree	agree	strongly agree	strongly agree	agree	agree	agree	strongly agree	strongly agree	strongly agree	strongly agree	strongly agree	strongly agree	agree	agree	strongly agree	agree	agree	strongly agree	strongly agree	strongly agree	strongly agree	strongly agree	strongly agree	strongly agree	strongly agree	strongly agree	strongly agree	strongly agree	strongly agree
2022-04-16 19:02:16	male	between 18 and 40 years	bachelor	student	I have never used mobile echommerce applications	neutral	neutral	neutral	neutral	neutral	neutral	neutral	neutral	neutral	neutral	agree	neutral	neutral	neutral	neutral	neutral	neutral	neutral	neutral	neutral	neutral	neutral	neutral	neutral	neutral	neutral	neutral	neutral	neutral	neutral	neutral	neutral	neutral	neutral	neutral	neutral	neutral	neutral	neutral	neutral	neutral	neutral	neutral	neutral
2022-04-16 19:02:22	male	between 18 and 40 years	bachelor	student	I have never used mobile echommerce applications	neutral	neutral	neutral	neutral	neutral	neutral	neutral	strongly disagree	neutral	neutral	neutral	neutral	neutral	neutral	neutral	neutral	neutral	neutral	neutral	neutral	neutral	neutral	neutral	neutral	neutral	neutral	neutral	neutral	neutral	neutral	neutral	neutral	neutral	neutral	neutral	neutral	neutral	neutral	neutral	neutral	neutral	neutral	neutral	neutral
2022-04-16 19:02:38	male	between 18 and 40 years	bachelor	student	I have never used mobile echommerce applications	strongly agree	neutral	neutral	neutral	neutral	neutral	neutral	neutral	strongly disagree	agree	agree	agree	agree	agree	agree	agree	agree	agree	agree	neutral	agree	agree	agree	agree	agree	agree	agree	agree	agree	agree	agree	agree	agree	agree	agree	agree	agree	agree	agree	agree	agree	agree	agree	agree
2022-04-16 19:04:49	male	between 18 and 40 years	high school	student	I have never used mobile echommerce applications	agree	agree	agree	agree	agree	agree	agree	agree	agree	agree	agree	agree	agree	agree	agree	agree	agree	agree	agree	agree	agree	agree	agree	agree	agree	agree	agree	agree	agree	agree	agree	agree	agree	agree	agree	agree	agree	agree	agree	agree	agree	strongly disagree	strongly disagree	strongly disagree
2022-04-16 19:05:51	male	between 18 and 40 years	bachelor	student	3 years and more	agree	agree	neutral	neutral	agree	neutral	neutral	neutral	neutral	strongly disagree	strongly agree	agree	agree	agree	agree	agree	agree	strongly agree	agree	neutral	لا strongly agree	لا strongly agree	strongly agree	neutral	neutral	neutral	neutral	neutral	neutral	neutral	agree	strongly agree	neutral	neutral	neutral	neutral	neutral	neutral	neutral	neutral	neutral	neutral	neutral	neutral
2022-04-16 19:07:30	male	between 18 and 40 years	bachelor	student	3 years and more	strongly agree	strongly agree	strongly agree	strongly agree	strongly agree	strongly agree	strongly agree	strongly agree	strongly agree	strongly agree	strongly agree	strongly agree	strongly agree	strongly agree	strongly agree	strongly agree	strongly agree	strongly agree	strongly agree	strongly agree	strongly agree	strongly agree	strongly agree	strongly agree	strongly agree	strongly agree	strongly agree	strongly agree	strongly agree	strongly agree	strongly agree	strongly agree	strongly agree	strongly agree	strongly agree	strongly agree	strongly agree	strongly agree	strongly agree	strongly agree	strongly agree	strongly agree	strongly agree	strongly agree
2022-04-16 19:09:44	male	between 18 and 40 years	bachelor	student	I have never used mobile echommerce applications	neutral	agree	neutral	neutral	neutral	neutral	neutral	neutral	neutral	neutral	neutral	neutral	agree	agree	agree	agree	agree	agree	agree	agree	agree	agree	agree	agree	neutral	neutral	neutral	neutral	neutral	neutral	neutral	neutral	neutral	agree	neutral	neutral	agree	neutral	agree	neutral	neutral	neutral	neutral	neutral
2022-04-16 19:17:59	male	between 18 and 40 years	bachelor	student	I have never used mobile echommerce applications	neutral	agree	strongly agree	agree	agree	agree	agree	agree	agree	agree	agree	agree	agree	agree	agree	agree	agree	agree	agree	agree	agree	agree	agree	agree	strongly agree	agree	agree	agree	agree	agree	agree	agree	agree	agree	agree	agree	agree	agree	agree	agree	agree	agree	agree	agree
2022-04-16 21:36:54	male	between 18 and 40 years	bachelor	student	from 1 year to less than 2 years	strongly agree	strongly agree	strongly agree	strongly agree	strongly agree	strongly agree	strongly agree	neutral	strongly disagree	strongly agree	strongly agree	strongly agree	strongly agree	strongly agree	strongly agree	strongly agree	strongly agree	strongly agree	strongly agree	strongly agree	strongly agree	strongly agree	strongly agree	strongly agree	strongly agree	strongly agree	strongly agree	strongly agree	strongly agree	strongly agree	strongly agree	strongly agree	strongly agree	strongly agree	strongly agree	strongly agree	strongly agree	strongly agree	strongly agree	strongly agree	strongly agree	strongly agree	strongly agree	strongly agree
2022-04-16 21:47:25	male	between 18 and 40 years	bachelor	student	I have never used mobile echommerce applications	neutral	neutral	neutral	strongly disagree	neutral	neutral	agree	neutral	strongly disagree	strongly disagree	agree	agree	strongly disagree	strongly agree	strongly disagree	strongly disagree	strongly disagree	strongly disagree	strongly disagree	strongly disagree	strongly disagree	strongly disagree	strongly disagree	strongly disagree	strongly disagree	strongly disagree	strongly disagree	strongly disagree	strongly disagree	strongly disagree	strongly disagree	strongly disagree	neutral	strongly agree	neutral	strongly disagree	strongly disagree	strongly disagree	strongly agree	strongly disagree	strongly disagree	strongly disagree	strongly disagree	agree
2022-04-16 23:32:32	male	between 18 and 40 years	bachelor	student	I have never used mobile echommerce applications	strongly agree	strongly disagree	strongly agree	strongly agree	strongly agree	strongly agree	strongly agree	agree	neutral	neutral	agree	strongly agree	strongly agree	strongly agree	strongly agree	strongly agree	strongly agree	agree	strongly agree	strongly agree	strongly agree	strongly agree	agree	agree	agree	strongly agree	agree	strongly agree	strongly agree	strongly agree	strongly agree	strongly agree	strongly agree	agree	strongly agree	agree	strongly agree	agree	strongly agree	strongly agree	strongly agree	agree	neutral	strongly agree
2022-04-16 23:33:21	male	between 18 and 40 years	high school	student	from 1 year to less than 2 years	agree	neutral	agree	neutral	neutral	neutral	agree	agree	neutral	neutral	agree	agree	agree	agree	agree	agree	neutral	neutral	neutral	neutral	neutral	agree	agree	agree	agree	strongly agree	neutral	agree	neutral	neutral	neutral	strongly disagree	neutral	neutral	strongly disagree	neutral	neutral	agree	agree	agree	strongly agree	strongly disagree	neutral	agree
2022-04-16 23:36:51	male	between 18 and 40 years	bachelor	student	from 1 year to less than 2 years	strongly agree	agree	strongly agree	strongly agree	neutral	agree	agree	neutral	لا strongly agree	strongly agree	neutral	strongly agree	agree	agree	agree	agree	neutral	strongly agree	strongly agree	agree	agree	neutral	agree	neutral	strongly disagree	agree	neutral	agree	لا strongly agree	neutral	neutral	strongly disagree	neutral	agree	strongly disagree	agree	agree	agree	neutral	strongly agree	strongly agree	agree	agree	agree
2022-04-16 23:37:40	male	between 18 and 40 years	bachelor	student	I have never used mobile echommerce applications	strongly agree	strongly agree	strongly agree	strongly agree	strongly agree	strongly agree	strongly agree	strongly agree	strongly agree	strongly agree	strongly agree	strongly agree	strongly agree	strongly agree	strongly agree	strongly agree	strongly agree	strongly agree	strongly agree	strongly agree	strongly agree	strongly agree	strongly agree	strongly agree	strongly agree	strongly agree	strongly agree	agree	agree	agree	agree	agree	agree	neutral	strongly agree	strongly agree	strongly agree	strongly agree	strongly agree	strongly agree	strongly agree	strongly agree	strongly agree	strongly agree
2022-04-16 23:41:50	male	between 18 and 40 years	high school	student	3 years and more	agree	agree	agree	agree	agree	agree	agree	agree	agree	agree	agree	agree	agree	agree	agree	agree	agree	agree	agree	agree	agree	agree	agree	agree	agree	agree	agree	agree	agree	agree	agree	agree	agree	agree	agree	agree	agree	agree	agree	agree	agree	agree	agree	agree
2022-04-16 23:45:49	male	between 18 and 40 years	bachelor	student	I have never used mobile echommerce applications	agree	agree	agree	strongly agree	agree	agree	agree	agree	agree	agree	neutral	neutral	agree	agree	agree	agree	agree	agree	agree	agree	agree	agree	neutral	neutral	neutral	neutral	neutral	neutral	neutral	strongly disagree	neutral	agree	neutral	neutral	neutral	neutral	neutral	neutral	agree	strongly disagree	strongly disagree	strongly disagree	strongly disagree	strongly disagree
2022-04-17 00:03:45	male	between 18 and 40 years	bachelor	student	I have never used mobile echommerce applications	agree	agree	agree	agree	agree	agree	agree	agree	agree	agree	agree	agree	agree	agree	agree	agree	agree	agree	agree	agree	neutral	agree	agree	agree	agree	agree	agree	agree	agree	agree	agree	agree	agree	agree	agree	agree	agree	agree	agree	neutral	neutral	neutral	neutral	neutral
2022-04-17 00:22:17	female	between 18 and 40 years	postgraduate	Government employee	3 years and more	strongly agree	neutral	agree	agree	agree	agree	agree	neutral	neutral	neutral	agree	agree	neutral	strongly agree	strongly agree	strongly agree	strongly agree	agree	neutral	agree	neutral	neutral	strongly disagree	strongly disagree	neutral	agree	neutral	neutral	neutral	agree	neutral	neutral	neutral	neutral	neutral	neutral	neutral	neutral	agree	agree	agree	strongly disagree	strongly disagree	strongly disagree
2022-04-17 00:33:39	male	between 18 and 40 years	bachelor	student	3 years and more	strongly agree	strongly agree	strongly agree	strongly agree	strongly agree	strongly agree	strongly agree	strongly agree	strongly agree	strongly agree	strongly agree	strongly agree	strongly agree	strongly agree	strongly agree	strongly agree	strongly agree	strongly agree	strongly agree	strongly agree	strongly agree	strongly agree	strongly agree	strongly agree	strongly agree	strongly agree	strongly agree	strongly agree	strongly agree	strongly agree	strongly agree	strongly agree	strongly agree	strongly agree	strongly agree	strongly agree	strongly agree	strongly agree	strongly agree	strongly agree	strongly agree	strongly agree	strongly agree	strongly agree
2022-04-17 02:02:25	male	between 18 and 40 years	high school	student	I have never used mobile echommerce applications	neutral	neutral	neutral	neutral	neutral	neutral	neutral	neutral	neutral	neutral	neutral	neutral	neutral	neutral	neutral	neutral	neutral	neutral	neutral	neutral	neutral	neutral	neutral	neutral	neutral	neutral	neutral	neutral	neutral	neutral	neutral	neutral	neutral	neutral	neutral	neutral	neutral	neutral	neutral	neutral	agree	neutral	neutral	neutral
2022-04-17 03:10:31	male	between 18 and 40 years	bachelor	student	I have never used mobile echommerce applications	agree	neutral	agree	agree	agree	agree	agree	agree	agree	agree	agree	agree	agree	agree	agree	agree	agree	neutral	agree	agree	agree	agree	agree	agree	agree	agree	agree	agree	neutral	agree	agree	agree	agree	agree	agree	agree	agree	agree	agree	agree	strongly agree	strongly agree	agree	agree
2022-04-17 03:39:27	male	between 18 and 40 years	high school	student	from 2 to 3 years	agree	strongly agree	strongly agree	strongly agree	agree	strongly agree	strongly agree	strongly agree	neutral	strongly agree	agree	agree	agree	strongly agree	strongly agree	agree	strongly agree	strongly agree	agree	neutral	strongly agree	agree	agree	strongly agree	strongly agree	strongly agree	strongly agree	strongly agree	strongly agree	strongly agree	strongly agree	strongly agree	strongly agree	strongly agree	strongly agree	strongly agree	strongly agree	strongly agree	agree	agree	agree	strongly agree	strongly agree	neutral
2022-04-17 04:24:10	male	between 18 and 40 years	high school	student	I have never used mobile echommerce applications	strongly agree	agree	agree	agree	agree	strongly agree	strongly agree	strongly agree	لا strongly agree	strongly agree	strongly agree	strongly agree	strongly agree	agree	strongly agree	strongly agree	strongly agree	strongly agree	strongly agree	strongly agree	agree	agree	agree	strongly agree	strongly agree	strongly agree	agree	agree	agree	strongly agree	strongly agree	agree	strongly agree	agree	agree	agree	neutral	neutral	agree	strongly disagree	agree	strongly agree	strongly agree	strongly agree
2022-04-17 04:26:25	male	between 18 and 40 years	high school	student	I have never used mobile echommerce applications	neutral	agree	agree	neutral	agree	agree	agree	neutral	neutral	neutral	neutral	neutral	neutral	neutral	neutral	neutral	neutral	neutral	neutral	neutral	neutral	neutral	neutral	neutral	neutral	neutral	neutral	neutral	neutral	neutral	neutral	neutral	neutral	neutral	neutral	neutral	neutral	neutral	neutral	neutral	neutral	neutral	neutral	neutral
2022-04-17 04:33:58	male	between 18 and 40 years	bachelor	student	I have never used mobile echommerce applications	strongly agree	strongly agree	strongly agree	strongly agree	strongly agree	strongly agree	strongly agree	strongly agree	strongly agree	strongly agree	strongly agree	strongly agree	strongly agree	strongly agree	strongly agree	strongly agree	strongly agree	strongly agree	strongly agree	strongly agree	strongly agree	strongly agree	strongly agree	strongly agree	strongly agree	strongly agree	strongly agree	strongly agree	strongly agree	strongly agree	strongly agree	strongly agree	strongly agree	strongly agree	strongly agree	strongly agree	strongly agree	strongly agree	strongly agree	strongly agree	strongly agree	لا strongly agree	لا strongly agree	لا strongly agree
2022-04-17 05:04:07	male	between 18 and 40 years	bachelor	student	from 1 year to less than 2 years	agree	strongly agree	neutral	strongly agree	agree	neutral	neutral	neutral	neutral	strongly agree	agree	neutral	strongly agree	neutral	neutral	neutral	agree	agree	neutral	strongly agree	strongly agree	strongly agree	strongly agree	neutral	neutral	neutral	agree	agree	agree	neutral	neutral	neutral	agree	agree	agree	agree	strongly agree	strongly agree	strongly agree	strongly agree	strongly agree	neutral	neutral	neutral
2022-04-17 09:32:02	male	between 18 and 40 years	high school	student	3 years and more	strongly agree	strongly agree	strongly agree	strongly agree	agree	strongly agree	strongly agree	strongly agree	agree	agree	neutral	strongly disagree	neutral	strongly agree	strongly agree	neutral	strongly agree	strongly agree	strongly disagree	agree	لا strongly agree	neutral	strongly disagree	strongly agree	strongly agree	لا strongly agree	strongly agree	strongly disagree	neutral	strongly disagree	strongly disagree	strongly disagree	agree	strongly agree	strongly agree	strongly agree	strongly agree	neutral	agree	لا strongly agree	neutral	neutral	neutral	strongly agree
2022-04-17 10:30:34	male	between 18 and 40 years	bachelor	student	from 1 year to less than 2 years	strongly agree	agree	agree	agree	agree	agree	agree	agree	neutral	strongly disagree	agree	agree	strongly disagree	agree	agree	agree	agree	agree	agree	agree	agree	agree	agree	agree	agree	agree	agree	agree	agree	agree	agree	agree	strongly disagree	agree	agree	agree	agree	agree	agree	agree	strongly agree	agree	strongly disagree	agree
2022-04-17 15:08:26	male	between 18 and 40 years	bachelor	student	I have never used mobile echommerce applications	strongly agree	agree	agree	agree	agree	agree	strongly agree	agree	agree	strongly agree	strongly agree	strongly agree	strongly agree	strongly agree	strongly agree	strongly agree	strongly agree	agree	agree	neutral	agree	neutral	agree	strongly agree	neutral	agree	agree	neutral	neutral	agree	strongly agree	agree	agree	agree	strongly disagree	neutral	agree	neutral	agree	strongly agree	agree	neutral	neutral	neutral
2022-04-17 17:44:46	male	between 18 and 40 years	bachelor	student	I have never used mobile echommerce applications	neutral	neutral	neutral	neutral	neutral	neutral	agree	agree	neutral	neutral	neutral	neutral	neutral	agree	agree	agree	agree	agree	neutral	neutral	neutral	neutral	neutral	neutral	neutral	neutral	neutral	neutral	strongly agree	strongly agree	strongly agree	strongly disagree	strongly agree	neutral	neutral	neutral	neutral	neutral	neutral	neutral	neutral	neutral	neutral	agree
2022-04-17 19:31:01	male	between 18 and 40 years	bachelor	student	from 2 to 3 years	strongly agree	strongly agree	strongly agree	strongly agree	strongly agree	strongly agree	agree	agree	agree	agree	agree	agree	agree	strongly agree	strongly agree	strongly agree	strongly agree	strongly agree	strongly agree	strongly agree	strongly agree	strongly agree	strongly agree	strongly agree	neutral	neutral	neutral	neutral	neutral	neutral	neutral	neutral	neutral	neutral	neutral	neutral	neutral	agree	neutral	neutral	strongly agree	strongly agree	neutral	neutral
2022-04-17 19:33:52	male	between 18 and 40 years	bachelor	student	from 2 to 3 years	neutral	neutral	neutral	neutral	neutral	neutral	neutral	neutral	neutral	agree	agree	agree	agree	agree	agree	agree	agree	agree	agree	agree	agree	agree	agree	agree	neutral	neutral	neutral	neutral	neutral	neutral	neutral	neutral	neutral	neutral	neutral	agree	agree	agree	neutral	agree	agree	agree	agree	agree
2022-04-17 19:49:11	male	between 18 and 40 years	bachelor	student	3 years and more	strongly agree	strongly agree	strongly agree	strongly agree	strongly agree	strongly agree	strongly agree	strongly agree	strongly agree	strongly agree	strongly agree	strongly agree	strongly agree	strongly agree	strongly agree	strongly agree	strongly agree	strongly agree	strongly agree	strongly agree	strongly agree	strongly agree	strongly agree	strongly agree	strongly agree	strongly agree	strongly agree	strongly agree	strongly agree	strongly agree	strongly agree	strongly agree	strongly agree	strongly agree	strongly agree	strongly agree	strongly agree	strongly agree	strongly agree	strongly agree	strongly agree	strongly agree	strongly agree	strongly agree
2022-04-17 21:26:08	male	between 18 and 40 years	bachelor	student	I have never used mobile echommerce applications	strongly disagree	strongly disagree	strongly disagree	strongly disagree	strongly disagree	strongly disagree	strongly disagree	strongly disagree	strongly disagree	strongly disagree	strongly disagree	strongly disagree	strongly disagree	strongly disagree	strongly disagree	strongly disagree	strongly disagree	strongly disagree	strongly disagree	strongly disagree	strongly disagree	strongly disagree	strongly disagree	strongly disagree	strongly disagree	strongly disagree	strongly disagree	strongly disagree	strongly disagree	strongly disagree	strongly disagree	strongly disagree	strongly disagree	strongly disagree	strongly disagree	strongly disagree	strongly disagree	strongly disagree	strongly disagree	strongly disagree	strongly disagree	strongly disagree	strongly disagree	strongly disagree
2022-04-17 23:13:57	male	between 18 and 40 years	bachelor	student	from 1 year to less than 2 years	strongly disagree	strongly disagree	neutral	neutral	neutral	neutral	neutral	neutral	neutral	neutral	neutral	neutral	neutral	agree	neutral	neutral	neutral	neutral	neutral	agree	neutral	agree	neutral	neutral	neutral	neutral	neutral	neutral	neutral	neutral	neutral	neutral	neutral	neutral	neutral	strongly disagree	strongly disagree	strongly disagree	strongly disagree	strongly disagree	strongly disagree	strongly disagree	strongly disagree	strongly disagree
2022-04-18 10:41:57	male	between 18 and 40 years	high school	student	I have never used mobile echommerce applications	strongly agree	agree	neutral	agree	neutral	strongly agree	strongly agree	agree	لا strongly agree	neutral	agree	agree	agree	strongly disagree	strongly agree	strongly agree	strongly agree	strongly agree	strongly agree	strongly agree	agree	strongly disagree	neutral	لا strongly agree	strongly agree	strongly agree	strongly agree	agree	neutral	agree	agree	agree	strongly agree	agree	strongly disagree	neutral	لا strongly agree	agree	agree	لا strongly agree	agree	agree	neutral	neutral
2022-04-18 11:42:44	male	between 18 and 40 years	high school	student	I have never used mobile echommerce applications	neutral	neutral	neutral	strongly disagree	neutral	neutral	neutral	strongly agree	strongly agree	agree	agree	agree	agree	strongly agree	strongly agree	agree	strongly agree	agree	strongly agree	strongly disagree	strongly agree	strongly agree	strongly agree	strongly agree	strongly agree	strongly agree	strongly agree	strongly agree	strongly agree	strongly agree	strongly agree	strongly agree	strongly agree	strongly agree	strongly agree	strongly agree	strongly agree	strongly agree	strongly agree	agree	strongly disagree	strongly disagree	neutral	neutral
2022-04-18 12:04:16	male	between 18 and 40 years	bachelor	student	3 years and more	strongly agree	strongly agree	strongly agree	strongly agree	strongly agree	strongly agree	strongly agree	strongly agree	strongly agree	strongly agree	strongly agree	strongly agree	strongly agree	strongly agree	strongly agree	strongly agree	strongly agree	strongly agree	strongly agree	strongly agree	strongly agree	strongly agree	agree	agree	agree	agree	agree	agree	agree	agree	agree	agree	strongly agree	agree	agree	agree	agree	strongly agree	strongly agree	strongly agree	strongly agree	neutral	strongly agree	strongly agree
2022-04-18 12:14:28	male	between 18 and 40 years	bachelor	student	less than one year	agree	strongly disagree	agree	strongly agree	strongly agree	strongly agree	strongly agree	strongly agree	strongly disagree	neutral	neutral	neutral	agree	agree	agree	agree	agree	agree	agree	agree	agree	agree	agree	agree	agree	agree	agree	agree	agree	agree	agree	agree	agree	neutral	agree	agree	agree	agree	agree	agree	agree	agree	agree	agree
2022-04-18 13:11:41	male	between 18 and 40 years	high school	student	I have never used mobile echommerce applications	neutral	agree	neutral	neutral	strongly disagree	strongly disagree	strongly disagree	agree	agree	agree	agree	agree	agree	agree	agree	agree	agree	agree	agree	agree	agree	agree	agree	agree	agree	neutral	neutral	neutral	neutral	neutral	neutral	neutral	neutral	neutral	neutral	neutral	neutral	neutral	neutral	neutral	neutral	neutral	neutral	neutral
2022-04-18 13:14:11	male	between 18 and 40 years	high school	student	I have never used mobile echommerce applications	neutral	neutral	neutral	neutral	neutral	neutral	neutral	agree	agree	neutral	neutral	agree	strongly disagree	agree	strongly disagree	agree	agree	neutral	strongly disagree	strongly disagree	neutral	neutral	neutral	neutral	agree	agree	agree	agree	neutral	neutral	neutral	neutral	neutral	neutral	neutral	neutral	neutral	neutral	neutral	neutral	neutral	neutral	neutral	neutral
2022-04-18 14:01:41	male	between 18 and 40 years	bachelor	student	3 years and more	strongly agree	strongly agree	strongly agree	strongly agree	strongly agree	strongly agree	strongly agree	strongly agree	strongly agree	strongly agree	strongly agree	strongly agree	strongly agree	strongly agree	strongly agree	strongly agree	strongly agree	strongly agree	strongly agree	strongly agree	strongly agree	strongly agree	strongly agree	strongly agree	strongly agree	strongly agree	strongly agree	strongly agree	strongly agree	strongly agree	strongly agree	strongly agree	strongly agree	strongly agree	strongly agree	strongly agree	strongly agree	strongly agree	strongly agree	strongly agree	strongly agree	strongly agree	strongly agree	strongly agree
2022-04-19 03:53:11	male	between 18 and 40 years	high school	other	3 years and more	neutral	neutral	neutral	neutral	neutral	neutral	neutral	neutral	neutral	neutral	neutral	neutral	neutral	neutral	neutral	neutral	neutral	neutral	neutral	neutral	neutral	neutral	neutral	neutral	neutral	neutral	neutral	neutral	neutral	neutral	neutral	neutral	neutral	neutral	neutral	neutral	neutral	neutral	neutral	neutral	neutral	neutral	neutral	neutral
2022-04-19 10:30:21	female	between 41 and 60 years	high school	student	3 years and more	strongly agree	strongly agree	strongly agree	strongly agree	strongly agree	strongly agree	strongly agree	strongly agree	strongly disagree	agree	strongly agree	strongly agree	strongly agree	strongly agree	strongly agree	strongly agree	strongly agree	strongly agree	strongly agree	strongly agree	strongly agree	strongly agree	strongly agree	agree	agree	agree	agree	agree	agree	agree	agree	agree	agree	agree	agree	agree	agree	agree	agree	agree	agree	strongly disagree	agree	agree
[truncated: 11 more columns]
